1 **Title:** Geometrical model explains multiple preferred escape trajectories of fish

2 **Short title:** Geometrical model for escape trajectories

3 **Author affiliations:**

4 Yuuki Kawabata<sup>a,\*</sup>, Hideyuki Akada<sup>b</sup>, Ken-ichiro Shimatani<sup>c</sup>, Gregory N. Nishihara<sup>d</sup>, Hibiki Kimura<sup>a</sup>,  
5 Nishiumi Nozomi<sup>a,e</sup>, Paolo Domenici<sup>f</sup>

6 <sup>a</sup>*Graduate School of Fisheries and Environmental Sciences, Nagasaki University, 1-14 Bunkyo-machi,*  
7 *Nagasaki 852-8521, Japan*

8 <sup>b</sup>*Faculty of Fisheries, Nagasaki University, 1-14 Bunkyo-machi, Nagasaki 852-8521, Japan*

9 <sup>c</sup>*The Institute of Statistical Mathematics, 10-3 Midori-cho, Tachikawa, Tokyo 190-8562, Japan*

10 <sup>d</sup>*Institute for East China Sea Research, Organization for Marine Science Technology, Nagasaki*  
11 *University, 1551-7 Taira-machi, Nagasaki 851-2213, Japan*

12 <sup>e</sup>*National Institute for Basic Biology, 5-1 Higashiyama, Myodaiji, Okazaki, Aichi 444-8787, Japan.*

13 <sup>f</sup>*CNR-IAS, Località Sa Mardini, 09170, Torregrande, Oristano, Italy*

14 **\*Corresponding author:** Yuuki Kawabata

15 Email: [yuuki-k@nagasaki-u.ac.jp](mailto:yuuki-k@nagasaki-u.ac.jp); Tel: +81-(0)95-819-2824

16

17 **Author contributions:** Y.K. conceived the study; Y.K. and P.D. constructed the theoretical model; Y.K.  
18 and H.A. designed the experiment, Y.K., H.A., H.K., and N.N. conducted the experiment; H.A. and  
19 H.K. digitized the videos; Y.K., K.S., G.N.N., and P.D. conducted statistical analyses; Y.K. wrote the  
20 manuscript with input from K.S., G.N.N., N.N., and P.D.

21 **Keywords:** escape direction; escape response; escape turn; mathematical model; predator evasion

22

23 **Abstract**

24 To evade predators, many prey perform rapid escape movements. The resulting escape trajectory (ET)  
25 – measured as the angle of escape direction relative to the predator’s approach path – plays a major  
26 role in avoiding predation. Previous geometrical models predict a single ET; however, many animals  
27 (fish and other animal taxa) show highly variable ETs with multiple preferred directions. Although  
28 such a high ET variability may confer unpredictability, preventing predators from adopting counter-  
29 strategies, the reasons why animals prefer specific multiple ETs remain unclear. Here, we constructed  
30 a novel geometrical model in which  $T_{\text{diff}}$  (the time difference between the prey entering the safety zone  
31 and the predator reaching that entry point) is expected to be maximized. We tested this prediction by  
32 analyzing the escape responses of *Pagrus major* attacked by a dummy predator. At each initial body  
33 orientation of the prey relative to the predator, our model predicts a multimodal ET with an optimal  
34 ET at the maximum  $T_{\text{diff}}$  ( $T_{\text{diff},1}$ ) and a suboptimal ET at a second local maximum of  $T_{\text{diff}}$  ( $T_{\text{diff},2}$ ). Our  
35 experiments show that when  $T_{\text{diff},1} - T_{\text{diff},2}$  is negligible, the prey uses optimal or suboptimal ETs to a  
36 similar extent, in line with the idea of unpredictability. The experimentally observed ET distribution is  
37 consistent with the model, showing two large peaks at 110–130° and 170–180° away from the predator.  
38 Because various animal taxa show multiple preferred ETs similar to those observed here, this  
39 behavioral phenotype may result from convergent evolution that combines maximal  $T_{\text{diff}}$  with a high  
40 level of unpredictability.

41

42 **Significance Statement**

43 Animals from many taxa escape from suddenly approaching threats, such as ambush predators, by  
44 using multiple preferred escape trajectories. However, the reason why these multiple preferred escape  
45 trajectories are used is still unknown. By fitting a newly constructed model to the empirical escape  
46 response data, we show that the seemingly complex multiple preferred escape trajectories can arise  
47 from a simple geometrical rule which maximizes the time difference between when the prey enters the  
48 safety zone and when the predator reaches that entry point. Our results open new avenues of  
49 investigation for understanding how animals choose their escape trajectories from behavioral and  
50 neurosensory perspectives.

51

## 52 **Introduction**

53 When exposed to sudden threatening stimuli such as ambush predators, many prey initiate escape  
54 responses that include turning swiftly and accelerating away from the threat. The escape responses of  
55 many invertebrate and lower vertebrate species are controlled by giant neurons that ensure a short  
56 response time (1). Many previous studies have focused on two behavioral traits that are fundamental  
57 for avoiding predation: when to escape (i.e., flight initiation distance, which is measured as the distance  
58 from the predator at the onset of escape) and where to escape [i.e., escape trajectory (ET), which is  
59 measured as the angle of escape direction relative to the stimulus direction] (2). Previous studies have  
60 investigated the behavioral and environmental contexts affecting these variables (3-8), because they  
61 largely determine the success or failure of predator evasion (9-13), and hence the fitness of the prey  
62 species. A large number of models on how animals determine their flight initiation distances have been  
63 formulated and tested by experiments (2). Although a number of models have also been developed to  
64 predict animal ETs (4, 14, 15), there are still some unanswered questions about how the variability of  
65 the observed ETs is generated.

66 Previous geometrical models predict a single ET that depends on the relative speeds of the  
67 predator and the prey (4, 14, 15). However, these simple models do not explain the complex ET  
68 distributions reported in empirical studies on various taxa of invertebrates and lower vertebrates  
69 (reviewed in ref. 16). Whereas some animals exhibit unimodal ET patterns that satisfy the geometrical  
70 models (e.g., ref. 17), many animals show multimodal ETs within a limited angular sector (esp., 90–

71 180°) (e.g., ref. 4, 5, 18). To explore the discrepancy between the predictions of the models and  
72 empirical data, some researchers have hypothesized mechanical/sensory constraints (16, 19) and  
73 unpredictability, in line with the idea of a protean response that does not allow predators to adopt  
74 counter-strategies (19-21). Although these hypotheses, together with the previous geometrical models,  
75 can explain the ET variability within a limited angular sector, the reasons why animals prefer specific  
76 multiple ETs still remain unclear.

77         In previous geometrical models, the prey was assumed to instantaneously escape in any  
78 direction, irrespective of the prey's initial body orientation relative to the predator's approach path  
79 (hereafter, initial orientation) (4, 14, 15). However, additional time is required for the change of the  
80 heading direction (i.e. turn), therefore a realistic model needs to take into account that the predator can  
81 approach the prey more closely while the prey is turning (12). Additionally, in previous models,  
82 attacking predators were assumed to move for an infinite distance at a constant speed (4, 14, 15).  
83 However, the attacks of many real predators, especially ambush ones, end at a certain distance from  
84 initial positions of the prey (22-24). Therefore, we constructed a geometrical model that incorporates  
85 two additional factors: the time required for the prey to turn and the endpoint of the predator attack.  
86 We tested whether our model could predict empirically observed multimodal ETs, using the escape  
87 response of the prey fish *Pagrus major* against an approaching dummy predator. The biological  
88 implications resulting from the model and experimental data are then discussed within the framework  
89 of predator-prey interactions.

90

## 91 **Model**

92 We revised a previous model proposed by Domenici (15, 25) (Fig. 1A). Other previous models (4, 14)  
93 made predictions that were similar to those of Domenici's model although they used different  
94 theoretical approaches. In Domenici's model, the predator with a certain width (i.e. the width of a  
95 killer whale's tail used as a weapon to catch prey) directly approaches the prey, and the prey (the whole  
96 body) should enter the safety zone before the predator reaches that entry point. In this model, the prey  
97 can instantaneously escape in any direction, and the predation threat moves linearly and infinitely.

98 In our new model (Fig. 1B), two factors are added to Domenici's model: the time required for  
99 the prey to turn and the endpoint of the predator attack. We assume that a prey with a certain initial  
100 orientation  $\beta$  (spanning 0–180°, where 0° and 180° correspond to being attacked from front and behind,  
101 respectively) evades a sudden predation threat. The edges of the safety zone are determined by the  
102 width of the predator gape  $D_{\text{width}}$ , and the distance between the prey's initial position and the predator's  
103 mouth position at the end of the predator attack  $D_{\text{attack}}$ . This model is based on the escape response of  
104 the horizontal plane, which is realistic for many fish species as well as invertebrate species that walk  
105 on substrates. Startled fish respond to the attack by turning at an angle  $\alpha$ , and the ET results from the  
106 angular sum of  $\alpha$  and  $\beta$ . ETs from the left and right sides were pooled and treated as though they were  
107 stimulated from the right side (Fig. S1; See "Definition of Angles" in Materials and Methods section  
108 for details).

109 The prey can escape from the predator when the time required for the prey to enter the safety  
110 zone ( $T_{\text{prey}}$ ) is shorter than the time required for the predator's mouth to reach that entry point ( $T_{\text{pred}}$ ).  
111 Therefore, the prey is assumed to optimize the difference between the  $T_{\text{pred}}$  and  $T_{\text{prey}}$  ( $T_{\text{diff}}$ ). To  
112 incorporate the time required for the prey to turn,  $T_{\text{prey}}$  was divided into two phases: the fast-start phase,  
113 which includes the time for turning and acceleration ( $T_1$ ), and the constant speed phase ( $T_2$ ). This  
114 assumption is consistent with the previous studies (26-28) and was supported by our experiment (See  
115 Fig. S3). Therefore:

$$116 \quad T_{\text{prey}} = T_1 + T_2 \quad [1]$$

117 For simplicity, the fish was assumed to end the fast-start phase at a certain displacement from the initial  
118 position in any  $\alpha$  ( $D_1$ ; the radius of the dotted circle in Fig. 1B) and to move at a constant speed  $U_{\text{prey}}$   
119 to cover the rest of the distance (toward the edge of the safety zone  $D_2$ , plus the length of the body that  
120 is posterior to the center of mass  $L_{\text{prey}}$ ). Because a larger  $|\alpha|$  requires further turning prior to forward  
121 locomotion, which takes time (26, 29), and the initial velocity after turning was dependent on  $|\alpha|$  in  
122 our experiment (See Fig. 3B),  $T_1$  is given by a function of  $|\alpha|$  [ $T_1(|\alpha|)$ ]. Therefore,  $T_{\text{prey}}$  can be  
123 expressed as:

$$124 \quad T_{\text{prey}} = T_1(|\alpha|) + \frac{D_2}{U_{\text{prey}}} + \frac{L_{\text{prey}}}{U_{\text{prey}}} \quad [2]$$

125  $T_{\text{pred}}$  can be expressed as:

$$126 \quad T_{\text{pred}} = \frac{D_3 + D_{\text{initial}}}{U_{\text{pred}}} \quad [3]$$



127 where  $D_3$  is the projection of the prey's escape path along the edge of the sideways safety zone,  $D_{\text{initial}}$   
 128 is the distance between the prey and the predator at the onset of the prey's escape response (i.e., the  
 129 flight initiation distance or reaction distance), and  $U_{\text{pred}}$  is the predator speed, which is assumed to  
 130 be constant. From equations [2] and [3],  $T_{\text{diff}}$  can be calculated as:

$$131 \quad T_{\text{diff}} = \frac{D_3}{U_{\text{pred}}} + \frac{D_{\text{initial}}}{U_{\text{pred}}} - T_1(|\alpha|) - \frac{D_2}{U_{\text{prey}}} - \frac{L_{\text{prey}}}{U_{\text{prey}}} \quad [4]$$

132 The ET toward the upper-left corner of the rectangular danger zone is calculated as  $180 -$   
 133  $\arctan\left(\frac{D_{\text{width}}}{2D_{\text{attack}}}\right)$  ( $^\circ$ ), and thus  $D_2$  and  $D_3$  can be expressed as:

$$134 \quad D_2 = \begin{cases} \frac{D_{\text{width}}}{2 \sin(\alpha + \beta)} - D_1, \alpha + \beta < 180 - \arctan\left(\frac{D_{\text{width}}}{2D_{\text{attack}}}\right) \\ \frac{D_{\text{attack}}}{\cos(180 - \alpha - \beta)} - D_1, \alpha + \beta \geq 180 - \arctan\left(\frac{D_{\text{width}}}{2D_{\text{attack}}}\right) \end{cases} \quad [5]$$

$$135 \quad D_3 = \begin{cases} \frac{D_{\text{width}} \tan(\alpha + \beta - 90)}{2}, \alpha + \beta < 180 - \arctan\left(\frac{D_{\text{width}}}{2D_{\text{attack}}}\right) \\ D_{\text{attack}}, \alpha + \beta \geq 180 - \arctan\left(\frac{D_{\text{width}}}{2D_{\text{attack}}}\right) \end{cases} \quad [6]$$

136 From equations [4], [5], and [6],

137  $T_{\text{diff}} =$

$$138 \quad \begin{cases} \frac{D_{\text{width}} \tan(\alpha + \beta - 90)}{2U_{\text{pred}}} - \frac{D_{\text{width}}}{2U_{\text{prey}} \sin(\alpha + \beta)} - T_1(|\alpha|) - \frac{D_1}{U_{\text{prey}}} + \frac{D_{\text{initial}}}{U_{\text{pred}}} - \frac{L_{\text{prey}}}{U_{\text{prey}}}, \alpha + \beta < 180 - \arctan\left(\frac{D_{\text{width}}}{2D_{\text{attack}}}\right) \\ \frac{D_{\text{attack}}}{U_{\text{pred}}} - \frac{D_{\text{attack}}}{U_{\text{prey}} \cos(180 - \alpha - \beta)} - T_1(|\alpha|) - \frac{D_1}{U_{\text{prey}}} + \frac{D_{\text{initial}}}{U_{\text{pred}}} - \frac{L_{\text{prey}}}{U_{\text{prey}}}, \alpha + \beta \geq 180 - \arctan\left(\frac{D_{\text{width}}}{2D_{\text{attack}}}\right) \end{cases} \quad [7]$$

139 Because the terms  $\frac{D_1}{U_{\text{prey}}}$ ,  $\frac{D_{\text{initial}}}{U_{\text{pred}}}$ , and  $\frac{L_{\text{prey}}}{U_{\text{prey}}}$  are independent of  $\alpha$  and  $\beta$ , we can calculate the relative

140 values of  $T_{\text{diff}}$  ( $T_{\text{diff}}'$ ) in response to the changes of  $\alpha$  and  $\beta$ , from  $D_{\text{width}}$ ,  $D_{\text{attack}}$ ,  $U_{\text{prey}}$ ,  $U_{\text{pred}}$ , and

141  $T_1(|\alpha|)$  as:

$$T'_{\text{diff}} = \begin{cases} \frac{D_{\text{width}} \tan(\alpha + \beta - 90)}{2U_{\text{pred}}} - \frac{D_{\text{width}}}{2U_{\text{prey}} \sin(\alpha + \beta)} - T_1(|\alpha|), \alpha + \beta < 180 - \arctan\left(\frac{D_{\text{width}}}{2D_{\text{attack}}}\right) \\ \frac{D_{\text{attack}}}{U_{\text{pred}}} - \frac{D_{\text{attack}}}{U_{\text{prey}} \cos(180 - \alpha - \beta)} - T_1(|\alpha|), \alpha + \beta \geq 180 - \arctan\left(\frac{D_{\text{width}}}{2D_{\text{attack}}}\right) \end{cases} \quad [8]$$

143 Given that the escape success is assumed to be dependent on  $T'_{\text{diff}}$ , the theoretically optimal ET can  
144 be expressed as:

$$145 \quad \text{The optimal ET} = \underset{\alpha+\beta}{\operatorname{argmax}}(T'_{\text{diff}}) \quad [9]$$

146

## 147 **Results**

### 148 **Experimental Results**

149 *P. major* exhibited a typical C-start escape response (Fig. S1), which consists of the initial bend (stage  
150 1), followed by the return tail flip (stage 2), and continuous swimming or coasting (stage 3) (30, 31).  
151 Figure 2 shows the effect of the initial orientation  $\beta$  on the ETs. As was done in previous studies (16,  
152 32, 33), the away (contralateral) and toward (ipsilateral) responses, defined as the first detectable  
153 movement of the fish oriented either away from or toward the predator, were analyzed separately.  
154 When the initial orientation was small (i.e., the prey was attacked head-on; Fig. 2A;  $0^\circ \leq \beta < 30^\circ$ ), two  
155 peaks in the ET distribution were observed: a larger peak at around  $100^\circ$  (away response) and a smaller  
156 one at around  $-80^\circ$  (toward response). As the initial orientation increases (Fig. 2A;  $30^\circ \leq \beta < 60^\circ$ ), the  
157 peak at around  $-80^\circ$  disappeared. As the initial orientation further increases beyond  $60^\circ$ , another peak  
158 appeared at around  $170^\circ$  (Fig. 2A). When the initial orientation was large (i.e., the prey was attacked  
159 from behind; Fig. 2A;  $150^\circ \leq \beta \leq 180^\circ$ ), there were two similar-sized peaks in the ET at around  $130^\circ$

160 (toward response), and 180–200° (away response). There were significant effects of initial orientation  
161 on the ET in both the away and the toward responses [away: generalized additive mixed model  
162 (GAMM),  $F=214.81$ ,  $P<0.01$ ; toward: GAMM,  $F=373.92$ ,  $P<0.01$ ]. There were significant effects of  
163 initial orientation on the turn angle  $\alpha$  in away and toward responses (Fig. S2; away: GAMM,  $F=90.88$ ,  
164  $P<0.01$ ; toward: GAMM,  $F=42.48$ ,  $P<0.01$ ). In the overall frequency distribution of ETs pooling the  
165 data on all initial orientations and both toward and away responses, there were two large peaks at 120–  
166 130° and 170–180°, and one small peak at around  $-80^\circ$  (Fig. 2C). These 3 peaks were confirmed by  
167 the Gaussian mixture model analysis (34), where we fitted 1–9 Gaussian curves to the ETs, and selected  
168 the most parsimonious model based on the Akaike Information Criterion (AIC) (Table S1).

169         There were no significant effects of predator speed on the ET and  $|\alpha|$  in either the toward or  
170 the away responses (ET, away: GAMM,  $F=0.01$ ,  $P=0.93$ ; ET, toward: GAMM,  $F=0.05$ ,  $P=0.82$ ;  $|\alpha|$ ,  
171 away: GAMM,  $F=0.01$ ,  $P=0.93$ ;  $|\alpha|$ , toward: GAMM,  $F=0.05$ ,  $P=0.82$ ). There were no significant  
172 effects of predator speed [slow (from the minimum to the 33.3% quantile): 0.13~0.93 m/s; and fast  
173 (from the 66.7% quantile to the maximum): 1.29~1.88 m/s] on the variations of ETs and  $|\alpha|$  in all 30°  
174 initial orientation bins (Levene's test,  $W=0.01\sim3.57$ ,  $P=0.07\sim0.91$ ).

175

## 176 **Parameter Estimation**

177 The distance of the fast-start phase ( $D_1$ ) was regarded as 15 mm based on the relationship between  
178 displacement and velocity of the prey in the experiments (Fig. S3), where the velocity increased up to

179 about 15 mm of displacement from the initial position, beyond which it plateaus; over the 15 mm  
180 displacement from the initial position, there were no significant differences in the mean velocity  
181 between any combinations of 3-mm intervals in any  $30^\circ$   $|\alpha|$  bins (Fig. S3; paired  $t$ -test with  
182 Bonferroni's correction,  $P>0.05$ ). There were significant effects of  $|\alpha|$  on the time for a displacement  
183 of 15 mm from the initial position (GAMM,  $F=70.31$ ,  $P<0.01$ ) and on the mean velocity during the  
184 displacement (GAMM,  $F=69.49$ ,  $P<0.01$ ). However, there were no significant effects of  $|\alpha|$  on the time  
185 required for a displacement of 15 to 30 mm from the initial position (GAMM,  $F=1.52$ ,  $P=0.22$ ) and on  
186 the mean velocity during the displacement (GAMM,  $F=0.89$ ,  $P=0.27$ ). Therefore, the time required  
187 for the prey to turn was incorporated into the model by analyzing the relationship between  $|\alpha|$  and the  
188 time required for a displacement of 15 mm. The mean velocity of the prey during the constant phase  
189  $U_{\text{prey}}$  was estimated to be  $1.04 \text{ m s}^{-1}$ , based on the experimental data. Because the cut-off distance might  
190 affect the overall results of the study, we have repeated all the statistical analyses (See Tables 1, 2, and  
191 the text below for results with a cut-off distance of 15 mm) with cut-off distances of 10 and 20 mm  
192 and confirmed that the overall results are insensitive to the changes (Tables S2 and S3).

193 The relationship between  $|\alpha|$  and the time required for a displacement of 15 mm,  $T_1(|\alpha|)$ , is  
194 shown in Fig. 3. The time was constant up to  $44^\circ$  of  $|\alpha|$ , above which the time linearly increased in  
195 response to the increase of  $|\alpha|$  (Fig. 3A). In the hierarchical Bayesian model, the lowest widely  
196 applicable or Watanabe-Akaike information criterion (WAIC) was obtained for the piecewise linear  
197 regression model (Table 1). To understand the possible mechanism of the relationship, the relationship

198 between  $|\alpha|$  and initial velocity after a stage 1 turn, calculated as the displacement per second during  
199 the 10 milliseconds (ms) after the turn, was also evaluated (Fig. 3B). The velocity increased in response  
200 to  $|\alpha|$  up to  $46^\circ$ , beyond which it plateaus. In the hierarchical Bayesian model, the lowest WAIC was  
201 obtained for the piecewise linear regression model (Table 1). In both relationships, the regression lines  
202 by the piecewise linear model were similar to those by the GAMM, suggesting that the general trends  
203 of the relationships were clearly captured by this method. The change points of the two relationships  
204 were not significantly different [difference:  $1.70 \pm 18.01^\circ$  (mean  $\pm$  95% Bayesian credible intervals)].  
205 These results indicate that fish with a small  $|\alpha|$  ( $\ll 45^\circ$ ) can accomplish the stage 1 turn quickly but  
206 their velocity after the turn is lower, while fish with an intermediate  $|\alpha|$  ( $\approx 45^\circ$ ) spend a longer time on  
207 the stage 1 turn, but their velocity after the turn is higher. Fish with a large  $|\alpha|$  ( $\gg 45^\circ$ ) spend a still  
208 longer time on the stage 1 turn, but their velocity after the turn is similar to that with an intermediate  
209  $|\alpha|$  (Fig. 3).

210           Because we have no previous knowledge about the values of  $U_{\text{pred}}$  and  $D_{\text{attack}}$  that the prey  
211 regards as dangerous, we have optimized the values from the perspective of the prey using the  
212 experimental data (See Materials and Methods for details). Briefly, the optimal values for prey were  
213 obtained using the ranking index, where 0 means that the real fish chose the theoretically optimal ET  
214 where  $T_{\text{diff}}$  is the maximum, and 1 means that the real fish chose the theoretically worst ET where  $T_{\text{diff}}$   
215 is the minimum (e.g., going toward the predator). The result shows that the optimal value of  $D_{\text{attack}}$  is  
216 35.29 mm and the optimal value of  $U_{\text{pred}}$  is  $1.34 \text{ m s}^{-1}$ . Using data from previously published predator-

217 prey experiments on the same species of prey and predator (12), we show that the estimated  $D_{\text{attack}}$   
218 value is at the upper limit of the empirical data and the estimated  $U_{\text{pred}}$  value is higher than the mean  
219 of the observed predator speed (Fig. S4). These results suggest that the values independently estimated  
220 in the present study are reasonable, and the prey chooses the ETs by estimating the values of  $D_{\text{attack}}$   
221 and  $U_{\text{pred}}$  to be higher than their means used by the real predator, likely because an unsuccessful escape  
222 can result in death or severe injury.

223

## 224 **Comparison of Model Predictions and Experimental Data**

225 Figure 4A plots the relationships between the ET and the relative time difference  $T_{\text{diff}}$  for different  
226 initial orientations  $\beta$ , estimated by the geometrical model; Fig. 4B plots the relationship between the  
227 initial orientation and the theoretical ET. Forty percent, 77%, and 94% of observed ETs were within  
228 the top 10%, 25%, and 40% quantiles, respectively (0.1, 0.25, 0.40 ranking index) of the theoretical  
229 ETs (Figs. 4B and S5). In general, the predicted ETs are in line with the observed ones, where the  
230 model predicts a multimodal pattern of ET with a higher peak (i.e., optimal ET) at the maximum  $T_{\text{diff}}$   
231 ( $T_{\text{diff},1}$ ) and a second lower peak (i.e., suboptimal ET) at the second local maximum of  $T_{\text{diff}}$  ( $T_{\text{diff},2}$ ).  
232 When the initial orientation is  $<20^\circ$  (Figs. 4A;  $\beta = 15^\circ$ , 4B and 5B), the optimal and suboptimal ETs  
233 are around  $100^\circ$  (away response) and  $-100^\circ$  (toward response), respectively, which is consistent with  
234 the bimodal distribution of our experiment (Fig. 2A;  $0^\circ \leq \beta < 30^\circ$ ). At initial orientations in the range 20–  
235  $60^\circ$ , the suboptimal ET switches from around  $-100^\circ$  to  $170^\circ$  (Figs. 4A;  $\beta = 45^\circ$ , 4B and 5B), although

236  $T_{\text{diff},2}$  is extremely small compared to  $T_{\text{diff},1}$  (Figs. 4A;  $\beta = 45^\circ$ , 4B and 5B). Accordingly, the second  
237 peak (i.e., at around  $170^\circ$ ) was negligible in our experimental data (Fig. 2A;  $30^\circ \leq \beta < 60^\circ$ ), even though  
238 the fish can potentially reach such an ET (i.e., from such an initial orientation, an  $170^\circ$  ET is within  
239 the upper limit of  $|\alpha|$ ,  $147^\circ$ ). When the initial orientation is  $60\text{--}120^\circ$  (Figs. 4A;  $\beta = 75^\circ$  and  $\beta = 105^\circ$ , 4B  
240 and 5B), the optimal ET is  $100\text{--}140^\circ$  (gradually shifting from  $100^\circ$  to  $140^\circ$ ), and the suboptimal ET is  
241 around  $170^\circ$ . These two peaks and the shift of the optimal ET are consistent with the experimental  
242 results (Fig. 2A;  $60^\circ \leq \beta < 90^\circ$  and  $90^\circ \leq \beta < 120^\circ$ ). The values of the optimal and suboptimal ETs are  
243 reversed at initial orientations  $>120^\circ$  (Figs. 4B and 5B), as the optimal and suboptimal values become  
244  $170\text{--}180^\circ$  and around  $140^\circ$ , respectively (Fig. 4A). These results are again consistent with the bimodal  
245 distribution of our experiments (Fig. 2A;  $120^\circ \leq \beta < 150^\circ$  and  $150^\circ \leq \beta \leq 180^\circ$ ).

246 Figure 4C shows the circular histogram of the overall theoretical ETs estimated by Monte  
247 Carlo simulation. The theoretical ETs show two large peaks at around  $110\text{--}130^\circ$  and  $170\text{--}180^\circ$ , and  
248 one small peak at around  $-100^\circ$  (Fig. 4C). This theoretically estimated ET distribution is similar to the  
249 frequency distribution of the observed ETs (Fig. 2C); there were no significant differences in the  
250 frequency distribution between theoretical and observed ETs in 986 of 1000 simulations (Table 2; two-  
251 sample Kuiper test, median  $V=0.10$ , median  $P=0.63$ ).

252 To investigate how the initial orientation of the prey modulates the proportion of using the  
253 theoretically optimal ET (i.e., where  $T_{\text{diff}}$  is the maximum,  $T_{\text{diff},1}$ ) compared to using the suboptimal ET  
254 (i.e., where  $T_{\text{diff}}$  is the second local maximum,  $T_{\text{diff},2}$ ), we calculated the optimal ET advantage

255 ( $T_{\text{diff},1} - T_{\text{diff},2}$ ) (Fig. 5A), which represents the difference in the buffer time available for the prey to  
256 escape from the predator, at different initial orientations. The fish chose the optimal and suboptimal  
257 ETs to a similar extent when the optimal ET advantage is negligible (Fig. 5C). For example, when  
258 looking at the optimal ET advantage  $< 2$  ms, where the initial orientation is  $0-7^\circ$  and  $106-180^\circ$  (46%  
259 of all initial orientations), the proportion of the optimal ET used was only 55% (Fig. 5B and C). On  
260 the other hand, the proportion of the optimal ET used was 78% when the optimal ET advantage is  
261 higher than 5 ms (i.e., when the initial orientation is  $17-82^\circ$ ) (Fig. 5B and C). There was a significant  
262 effect of optimal ET advantage on the proportion of the optimal ET used by fish tested in our  
263 experiments (Mixed-effects logistic regression analysis,  $\chi^2 = 11.06$ ,  $P < 0.01$ ).

264 To investigate the effects of two factors [i.e., the endpoint of the predator attack  $D_{\text{attack}}$  and the  
265 time required for the prey to turn  $T_1(|\alpha|)$ ] on the predictions of ET separately, we constructed three  
266 additional geometrical models (Figs. S6–S8): a model that includes only  $D_{\text{attack}}$ , a model that includes  
267 only  $T_1(|\alpha|)$ , and a null model that includes neither factors (Fig. 1A and ref. 15). In all of these models,  
268 the theoretical ET distributions estimated through Monte Carlo simulations were significantly different  
269 from the observed ET distributions (Table 2; two-sample Kuiper test, median  $P < 0.01$ ). The null model  
270 and the model with  $T_1(|\alpha|)$  show unimodal patterns of ET distribution (Figs. S7 and S8). Although the  
271 model with  $D_{\text{attack}}$  shows a multimodal pattern of ET distribution, the simulation based on this model  
272 does not match the experimental data, likely because of differences in the relative heights of the peaks  
273 (Fig. S6).



274

## 275 **Discussion**

276 Our geometrical model, incorporating the endpoint of the predator attack,  $D_{\text{attack}}$ , and the time required  
277 for the prey to turn,  $T_1(|\alpha|)$ , to maximize the difference between the prey and the predator in the time  
278 of arrival at the edge of the safety zone,  $T_{\text{diff}}$ , clearly explains the multimodal patterns of ETs in *P.*  
279 *major*. Figure 6 shows an example of how multiple ETs result in successful escapes from predators.  
280 Specifically, according to the model, when the prey escapes at  $140^\circ$  or  $170^\circ$ , it will not be captured by  
281 the predator. On the other hand, when the prey escapes along an intermediate trajectory ( $157^\circ$ ), it will  
282 be captured because it swims toward the corner of the rectangular danger zone to exit it, and therefore  
283 it needs to travel a longer distance than when escaping at  $140^\circ$  or  $170^\circ$ . This example illustrates that  
284 the multimodal patterns of ETs are likely to be attributable to the existence of two escape routes: either  
285 moving sideways to depart from the predator's strike path or moving away from the predator to outrun  
286 it. Interestingly, both components of the predator-prey interaction [i.e.,  $D_{\text{attack}}$  and  $T_1(|\alpha|)$ ] added to the  
287 previous model (15) are important for accurate predictions of the ET distribution because when they  
288 are considered by the model separately, the predictions do not match the experimental data (Figs. S6  
289 and S7; Table 2).

290 Two different escape tactics have been proposed to enhance the success of predator evasion:  
291 the optimal tactic, which maximizes  $T_{\text{diff}}$  (i.e., the distance between the prey and the predator) (4, 14,  
292 15), and the protean tactic, which maximizes unpredictability to prevent predators from adjusting their

293 strike trajectories accordingly (19-21, 35). Our results suggest that the prey combines these two  
294 different tactics by using multiple preferred ETs. Specifically, when the optimal ET advantage is large  
295 (i.e., when the initial orientation is 20–60°), the prey mainly uses the optimal ET (Figs. 2A and 5).  
296 However, when the optimal ET advantage over the suboptimal ET is negligible (i.e., the initial  
297 orientation is close to 0° or within the range 110–180°), the prey uses optimal and suboptimal ETs to  
298 a similar extent (Figs. 2A and 5). In such cases, the escape trajectory of the prey would be highly  
299 unpredictable for the predator. While the unpredictability at initial orientations near 0° and 180° can  
300 be easily explained by the left-right indecision at orientations nearly perpendicular to the threat (18,  
301 33, 36), yielding ETs that are approximately symmetrical to the axis of the predator attack, the  
302 unpredictability observed at initial orientations near 110–180° is related to the similarly advantageous  
303 choice between escaping with an ET at around 140° or 180°. Interestingly, at initial orientations >120°,  
304 our results show that these two ETs are reached by using toward and away responses, respectively. The  
305 overlap between the ETs of toward and away responses in the overall dataset (Fig. 2) suggests that  
306 toward responses are not "tactical mistakes" of the prey that turns toward a threat, but are simply related  
307 to reaching an optimal or suboptimal ET. These results suggest that the prey strategically adjusts the  
308 use of optimal and protean tactics based on their initial orientation. This allows the prey to have  
309 unpredictable ETs, thereby preventing predators from anticipating their escape behavior, while keeping  
310  $T_{\text{diff}}$  large enough to enter the safety zone before the predator reaches it.

311 A relevant question from a perspective of neurosensory physiology is how the animals are

312 able to determine their ETs within milliseconds of response time. The initial orientation of the prey has  
313 been incorporated into various neural circuit models (37-40), but these models assume that prey  
314 animals always escape toward  $180^\circ$  (i.e., opposite to the stimulus source), irrespective of the initial  
315 orientation. However, the present study shows that animals use suboptimal ETs as well as optimal ETs,  
316 and that these ETs may change in a nonlinear fashion, depending on the initial orientation. Thus, we  
317 require new neurophysiological models of ETs to understand how neural circuits process the sensory  
318 cues of a threatening stimulus, resulting in muscle actions that generate multiple preferred ETs.

319         Our geometrical model assumes that the prey determines the ETs based on a fixed predator  
320 speed. This assumption is supported by the results of our experiments, where the effects of predator  
321 speed on the mean and variability of ETs are not significant. Although we did not find any effect of  
322 predator speed, it is possible that a speed outside the range we used may affect ETs. Recent studies  
323 show that larval zebrafish *Danio rerio* exhibit less variable ETs under faster threats than they do under  
324 slower threats (41, 42), and the difference in ET variability between fast and slow threats is dependent  
325 on whether the Mauthner cell is active or not (42). Therefore, any differences in the ET variability of  
326 the present study compared to previous studies could be related to the different involvement of the  
327 Mauthner-cells. Using the conventional geometrical model, Soto *et al.* (14) showed that the choice of  
328 ET only matters to a prey when the predator speed is intermediate, because a prey that is much faster  
329 than its predator can escape by a broad range of ETs, whereas a prey that is much slower than its  
330 predator cannot escape by any ETs (43). The predator speed used in this study is in the range of the

331 real predator speed in the previous study using the same species of both predator and prey (12). Thus,  
332 our results are ecologically relevant, and the prey is likely to have optimized their ETs based on a fixed  
333 predator speed, where the choice of ET strongly affects their survival.

334 The relationship between  $|\alpha|$  and the time required for a 15-mm displacement,  $T_1(|\alpha|)$ , (Fig.  
335 3A) indicates that the time required for a 15-mm displacement is relatively constant up to an  $|\alpha|$  of  
336 about  $45^\circ$ , while a further change in  $|\alpha|$  requires additional time. This relationship is likely to be  
337 attributable to the kinematics and hydrodynamics of the C-start escape response, because the initial  
338 velocity after the stage 1 turn increases linearly up to about  $45^\circ$ , beyond which it plateaus (Fig. 3B).  
339 Interestingly, a recent study on swimming efficiency during acceleration found that efficiency  
340 increases linearly with yaw amplitudes up to a certain value, beyond which efficiency plateaus (44).

341 Our geometrical model may be applicable to ETs in other predator-prey systems. The model  
342 assumes that the predator makes an in-line attack toward the prey with a limited attack distance. This  
343 assumption is likely to be met in attacks by ambush and stalk-and-attack predators (45), such as frogs  
344 (11), spiders (13), and many fish species (12, 22, 23, 46). Conversely, some predators adjust their strike  
345 direction before and/or during the attack (47-50). Such cases probably violate the model assumption  
346 and might be better modeled by a different predator movement (50, 51). Further empirical  
347 measurements of both prey and predator movements should be accumulated to confirm whether and  
348 in which cases our model accurately describes real predator-prey behaviors.

349 Our results represent a major advancement in understanding the basis of the variability in ETs

350 observed in previous works (reviewed in ref. 16). Our results suggest that prey use multiple preferred  
351 ETs to maximize the time difference between itself and the attacking predator, while keeping a high  
352 level of unpredictability. The results also suggest that prey strategically adjust the use of protean and  
353 optimal tactics with respect to the advantage of the optimal ET over the suboptimal ET. Because  
354 multimodal ETs similar to what we observed here have been found in many fish species and other  
355 animal taxa (16), this behavioral phenotype may result from convergent evolution in phylogenetically  
356 distant animals. From a neurosensory perspective, our findings open new avenues to investigate how  
357 the animals determine their ETs from multiple options with specific probabilities, which are modulated  
358 by the initial orientation with respect to the threat.

359

## 360 **Materials and Methods**

361

### 362 **Definition of the Angles**

363 The C-start escape response consists of an initial bend (stage 1), followed by a return tail flip (stage  
364 2), and continuous swimming or coasting (stage 3) (30, 31). In line with previous studies (16, 33, 52),  
365 we defined directionality (away or toward responses), initial orientation  $\beta$ , turn angle  $\alpha$ , and ET  $\alpha+\beta$   
366 as follows (Fig. S1). *Directionality*: the away and toward responses were defined by the first detectable  
367 movement of the fish in a direction either away from or toward the predator, respectively (16). *Initial*  
368 *orientation* ( $\beta$ ): the angle between the line passing through the prey's center of mass [CoM; located at

369 34% of the total length from the tip of the snout (12)] and the tip of the snout at the onset of stage 1,  
370 and the midline of the predator model attacking in a straight line. Initial orientation ranges from  $0^\circ$   
371 (i.e., when the prey is attacked from front) to  $180^\circ$  (i.e., when the prey is attacked from behind). *Turn*  
372 *angle* ( $\alpha$ ): the angle between the line passing through the CoM and the tip of the snout at the onset of  
373 stage 1, and the line passing through the CoM at the onset of stage 1 and the CoM at the end of stage  
374 2. The angles of the away and toward responses are assigned positive and negative values, respectively.  
375 *ET* ( $\alpha+\beta$ ): the sum of the initial orientation ( $\beta$ ) and the turn angle ( $\alpha$ ). ET is a circular variable since it  
376 can span  $360^\circ$ . Because the experimental data exhibited no asymmetry in directionality (Fisher's exact  
377 test,  $P=1.00$ ) and ET distribution (two-sample Kuiper test,  $V=0.14$ ,  $P=0.61$ ), we pooled the ETs from  
378 the left and right sides, treating all fish as though they were attacked from the right side (16).

379

## 380 **Experiment**

381 We have elicited the escape response of *P. major* [ $45.33\pm 3.48$  mm (mean $\pm$ s.d.) total length,  $n=23$ ]  
382 using a dummy predator. The experiment was conducted in a plastic tank ( $540\times 890\times 200$  mm) filled  
383 with seawater to a depth of 80 mm. The water temperature was maintained at 23.8 to 24.7°C. An  
384 individual *P. major* was introduced into a PVC pipe (60 mm diameter) set in the center of the tank and  
385 acclimated for 15 min. After the acclimation period, the PVC pipe was slowly removed, and the  
386 dummy predator, a cast of *Sebastiscus marmoratus* (164 mm in total length and 30 mm in mouth width),  
387 was moved toward the *P. major* for a distance of 200 mm by using a plastic rubber band (Fig. S9).

388 Because the previous work shows that *S. marmoratus* attacks *P. major* using a variable speed  
389 [ $1.10 \pm 0.65$  (0.09-2.31)  $\text{m s}^{-1}$ , mean $\pm$ s.d. (range)] (12), we used various strengths of plastic rubber  
390 bands to investigate the effect of predator speed on ET. The fish movements were recorded from above,  
391 using a high-speed video camera (HAS-L1; Ditect Co., Tokyo, Japan) at 500 frames  $\text{s}^{-1}$ . Each  
392 individual *P. major* was recorded from 5 to 20 times. The recorded videos were analyzed frame by  
393 frame using Dipp-Motion Pro 2D (Ditect Co.). The CoM and the tip of the mouth of *P. major* and the  
394 tip of the predator's mouth were digitized in each frame to calculate all the kinematic variables. The  
395 animal care and experimental procedures were approved by the Animal Care and Use Committee of  
396 the Faculty of Fisheries (Permit No. NF-0002), Nagasaki University in accordance with the Guidelines  
397 for Animal Experimentation of the Faculty of Fisheries and the Regulations of the Animal Care and  
398 Use Committee, Nagasaki University.

399         Because our geometrical model predicts that the initial orientation  $\beta$  and the predator speed  
400  $U_{\text{pred}}$  affect the ET and turn angle  $\alpha$ , we examined these effects by the experimental data using a  
401 GAMM with a normal distribution and identity link function (53). ET and  $\alpha$  were regarded as objective  
402 variables, while predator speed and initial orientation were regarded as explanatory variables and were  
403 modeled with a B-spline smoother. Fish ID was regarded as a random factor. Smoothed terms were  
404 fitted using penalized regression splines, and the amount of smoothing was determined using the  
405 restricted maximum likelihood (REML) method. As was done in previous studies (16, 32, 33), the  
406 away and toward responses were analyzed separately. The significance of the initial orientation and

407 predator speed was assessed by the  $F$ -test. The analysis was conducted using R 3.5.3 (R Foundation  
408 for Statistical Computing) with the R package *gamm4*.

409

## 410 **Parameter Estimation**

411 To predict the relationship between the ET and the relative time difference  $T_{\text{diff}}$  in each initial  
412 orientation by the geometrical model, we obtained  $D_{\text{width}}$ ,  $D_{\text{attack}}$ ,  $U_{\text{prey}}$ ,  $U_{\text{pred}}$ , and  $T_1(|\alpha|)$ .  $D_{\text{width}}$  was  
413 regarded as the mouth width of the dummy predator, which was 30 mm.  $U_{\text{prey}}$  and  $T_1(|\alpha|)$  were directly  
414 estimated by analyzing the escape responses of the prey.  $U_{\text{pred}}$  and  $D_{\text{attack}}$  were optimized by comparing  
415 the model outputs with observed ETs.

416

## 417 Estimation of the Prey's Kinematic Parameters

418 The relationship between  $|\alpha|$  and the time required for a displacement of 15 mm,  $T_1(|\alpha|)$ , was estimated  
419 by piecewise linear regression (54). We used piecewise linear regression rather than a commonly used  
420 smoothing method such as GAMM, because the smoothing method does not output the timing of the  
421 regression change and thus the biological interpretation of the regression curve is problematic (54).  
422 The time required for a displacement of 15 mm was regarded as an objective variable, whereas  $|\alpha|$  was  
423 regarded as an explanatory variable. Fish ID was included as a covariate in order to take into account  
424 potential individual differences in the relationship,  $T_1(|\alpha|)$ . To detect the possible kinematic mechanism  
425 of the relationship  $T_1(|\alpha|)$ , we also examined the relationship between  $|\alpha|$  and initial velocity after the



426 stage 1 turn, using piecewise linear regression. Initial velocity after the stage 1 turn was regarded as  
427 an objective variable,  $|\alpha|$  was regarded as an explanatory variable, and fish ID was included as a  
428 covariate. A hierarchical Bayesian model with a Markov chain Monte Carlo (MCMC) method was  
429 used to estimate these relationships (54, 55). The number of draws per chain, thinning rate, burn-in  
430 length, and number of chains were set as 200000, 1, 100000, and 5, respectively. To test the overall fit  
431 of the model, the WAIC of the model was compared with those of the null model (constant) and a  
432 simple linear regression model. MCMC was conducted using RStan 2.18.2 (Stan Development Team  
433 2019).

434

#### 435 Estimation of Predator speed and Endpoint of the Predator Attack

436 Because we had no previous knowledge about the values of  $U_{\text{pred}}$  and  $D_{\text{attack}}$  that the prey regards as  
437 dangerous (i.e., the values of  $U_{\text{pred}}$  and  $D_{\text{attack}}$  that trigger a response in the prey), we optimized the  
438 values using the experimental data in this study. We have input the obtained values of  $U_{\text{prey}}$ ,  $D_{\text{width}}$ , and  
439  $T_1(|\alpha|)$  into the theoretical model. The optimal values were obtained using the ranking index. The ranks  
440 of the observed ETs among the theoretical ET choices of  $1^\circ$  increment were standardized as the ranking  
441 index, where 0 means that the real fish chose the theoretically optimal ET where  $T_{\text{diff}}$  is the maximum,  
442 and 1 means that the real fish chose the theoretically worst ET where  $T_{\text{diff}}$  is the minimum. The optimal  
443 set of  $D_{\text{attack}}$  and  $U_{\text{pred}}$  values was estimated by minimizing the mean ranking index of the observed  
444 ETs. The distribution of the optimal ranking index was then fitted to the truncated normal distribution

445 and was used to predict how the fish chose the ETs from the continuum of the theoretically optimal  
446 and worst ETs.

447

## 448 **Model Predictions**

449 We input the above parameters [ $D_{\text{width}}$ ,  $D_{\text{attack}}$ ,  $U_{\text{prey}}$ ,  $U_{\text{pred}}$ , and  $T_1(|\alpha|)$ ] into the model and calculated  
450 how the choice of different ETs affects  $T_{\text{diff}}$  for each initial orientation  $\beta$ . Because there was a constraint  
451 on the possible range of  $|\alpha|$  [i.e., fish escaping by C-start have a minimum and maximum  $|\alpha|$  (26)], the  
452 range of  $|\alpha|$  was determined based on its minimum and maximum values observed in our experiment,  
453 which were 9~147°.

454 To estimate the overall frequency distribution of ETs that include the data on observed initial  
455 orientations, we conducted Monte Carlo simulations. In each observed initial orientation, the ET was  
456 chosen from the continuum of the theoretically optimal and worst ETs. The probability of the ET  
457 selection was determined by the truncated normal distribution of the optimal ranking index (e.g., the  
458 fish could choose theoretically good ETs with higher probability than theoretically bad ETs but the  
459 choice is a continuum based on the truncated normal distribution). This process was repeated 1000  
460 times to robustly estimate the frequency distribution of the theoretical ETs. In each simulation run, the  
461 frequency distribution of the theoretical ETs was compared with that of the observed ETs using the  
462 two-sample Kuiper test (56).

463 To investigate how the real prey changes the probability that it uses the theoretically optimal

464 ET or suboptimal ET, we regarded the difference between the maximum of  $T_{\text{diff}}$  (at the optimal ET)  
465 and the second local maximum of  $T_{\text{diff}}$  (at the suboptimal ET) as the optimal ET advantage, and  
466 theoretically estimated the values for all initial orientations. We then examined the relationship  
467 between the optimal ET advantage and the proportion of the optimal ET the prey actually chose using  
468 a mixed-effects logistic regression analysis (53). Each observed ET was designated as the optimal (1)  
469 or the suboptimal (0) based on whether the observed ET was closer to the optimal ET or suboptimal  
470 ET. When the prey chose the ET that was more than  $35^\circ$  different from both the optimal and suboptimal  
471 ETs, the ET data point was removed from the analysis (these cases were rare: 7%). The choice of ET  
472 [optimal (1) or suboptimal (0)] was regarded as an objective variable, while the optimal ET advantage  
473 was regarded as an explanatory variable. Fish ID was regarded as a random factor. The significance of  
474 the optimal ET advantage was assessed by the likelihood ratio test with  $\chi^2$  distribution. The analysis  
475 was conducted using R 3.5.3 with the R package *lme4*.

476 To investigate the effects of two factors [i.e., the endpoint of the predator attack  $D_{\text{attack}}$  and the  
477 time required for the prey to turn  $T_1(|\alpha|)$ ] on predictions of ET separately, we compared four  
478 geometrical models: the model that includes both  $D_{\text{attack}}$  and  $T_1(|\alpha|)$ , the model that includes only  $D_{\text{attack}}$ ,  
479 the model that includes only  $T_1(|\alpha|)$ , and the null model. Note that the null model is equivalent to the  
480 previous Domenici's model (15). In all models, the values of  $U_{\text{pred}}$  and  $D_{\text{attack}}$  were optimized using the  
481 ranking index. The overall frequency distributions of ETs were estimated through Monte Carlo

482 simulations, and in each simulation run, the theoretical ET distribution was compared with the  
483 observed ET distribution using the two-sample Kuiper test.

484

485 **ACKNOWLEDGMENTS.** We sincerely thank Y. Watanabe for his constructive comments on an  
486 early version of this paper. This study was funded by Grants-in-Aid for Scientific Research, Japan  
487 Society for the Promotion of Science, to Y.K. (17K17949 and 19H04936), Sumitomo Foundation to  
488 Y.K. (153128), and the ISM Cooperative Research Program to Y.K. and K.S (2014-ISM.CRP-2006).

489

#### 490 **References**

- 491 1. T. H. Bullock, "Comparative neuroethology of startle, rapid escape, and giant fiber-mediated  
492 responses" in Neural mechanisms of startle behavior. (Springer, 1984), pp. 1-13.
- 493 2. W. Cooper, D. T. Blumstein, *Escaping from predators* (Cambridge University Press, Cambridge,  
494 2015), pp. 442.
- 495 3. J. J. Meager, P. Domenici, A. Shingles, A. C. Utne-Palm, Escape responses in juvenile Atlantic cod  
496 *Gadus morhua* L.: the effects of turbidity and predator speed. *J. Exp. Biol.* **209**, 4174-4184 (2006).
- 497 4. S. A. Arnott, D. M. Neil, A. D. Ansell, Escape trajectories of the brown shrimp *Crangon crangon*,  
498 and a theoretical consideration of initial escape angles from predators. *J. Exp. Biol.* **202**, 193-209  
499 (1999).
- 500 5. P. W. Bateman, P. A. Fleming, Switching to Plan B: Changes in the escape tactics of two  
501 grasshopper species (Acrididae: Orthoptera) in response to repeated predatory approaches. *Behav.*  
502 *Ecol. Sociobiol.* **68**, 457-465 (2014).
- 503 6. A. M. Hein, M. A. Gil, C. R. Twomey, I. D. Couzin, S. A. Levin, Conserved behavioral circuits govern  
504 high-speed decision-making in wild fish shoals. *Proc. Natl. Acad. Sci. USA* **115**, 12224-12228 (2018).
- 505 7. M. Broom, G. D. Ruxton, You can run - or you can hide: Optimal strategies for cryptic prey against  
506 pursuit predators. *Behav. Ecol.* **16**, 534-540 (2005).
- 507 8. W. E. Cooper, Jr. *et al.*, Effects of risk, cost, and their interaction on optimal escape by nonrefuging  
508 Bonaire whiptail lizards, *Cnemidophorus murinus*. *Behav. Ecol.* **14**, 288-293 (2003).
- 509 9. J. A. Walker, C. K. Ghalambor, O. L. Griset, D. McKenney, D. N. Reznick, Do faster starts increase  
510 the probability of evading predators? *Funct. Ecol.* **19**, 808-815 (2005).
- 511 10. E. Shiffman, D. Eilam, Movement and direction of movement of a simulated prey affect the

- 512 success rate in barn owl *Tyto alba* attack. *J. Avian Biol.* **35**, 111-116 (2004).
- 513 11. J. M. Camhi, W. Tom, S. Volman, The escape behavior of the cockroach *Periplaneta americana*- II.  
514 Detection of natural predators by air displacement. *J. Comp. Physiol. A Sens. Neural Behav.*  
515 *Physiol.* **128**, 203-212 (1978).
- 516 12. H. Kimura, Y. Kawabata, Effect of initial body orientation on escape probability of prey fish  
517 escaping from predators. *Biol. Open* **7**, bio023812 (2018).
- 518 13. O. Dangles, N. Ory, T. Steinmann, J. P. Christides, J. Casas, Spider's attack versus cricket's escape:  
519 velocity modes determine success. *Anim. Behav.* **72**, 603-610 (2006).
- 520 14. D. Weihs, P. W. Webb, Optimal avoidance and evasion tactics in predator-prey interactions. *J. Theor.*  
521 *Biol.* **106**, 189-206 (1984).
- 522 15. P. Domenici, The visually mediated escape response in fish: predicting prey responsiveness and the  
523 locomotor behaviour of predators and prey. *Mar. Freshwat. Behav. Physiol.* **35**, 87-110 (2002).
- 524 16. P. Domenici, J. M. Blagburn, J. P. Bacon, Animal escapology II: Escape trajectory case studies. *J.*  
525 *Exp. Biol.* **214**, 2474-2494 (2011).
- 526 17. W. E. Cooper, Risk factors and escape strategy in the grasshopper *Dissosteira carolina*. *Behaviour*  
527 **143**, 1201-1218 (2006).
- 528 18. P. Domenici, R. W. Blake, Escape trajectories in angelfish (*Pterophyllum eimekei*). *J. Exp. Biol.*  
529 **177**, 253-272 (1993).
- 530 19. P. Domenici, J. M. Blagburn, J. P. Bacon, Animal escapology I: Theoretical issues and emerging  
531 trends in escape trajectories. *J. Exp. Biol.* **214**, 2463-2473 (2011).
- 532 20. D. A. Humphries, P. M. Driver, Protean defence by prey animals. *Oecologia* **5**, 285-302 (1970).
- 533 21. K. A. Jones, A. L. Jackson, G. D. Ruxton, Prey jitters: protean behaviour in grouped prey. *Behav.*  
534 *Ecol.* **22**, 831-836 (2011).
- 535 22. P. W. Webb, J. M. Skadsen, Strike tactics of *Esox*. *Can. J. Zool.* **58**, 1462-1469 (1980).
- 536 23. W. R. Fouts, D. R. Nelson, Prey capture by the pacific angel shark, *Squatina californica*: visually  
537 mediated strikes and ambush-site characteristics. *Copeia* **1999**, 304-312 (1999).
- 538 24. C. W. Anderson, The modulation of feeding behavior in response to prey type in the frog *Rana*  
539 *pipiens*. *J. Exp. Biol.* **179**, 1-12 (1993).
- 540 25. A. Paglianti, P. Domenici, The effect of size on the timing of visually mediated escape behaviour in  
541 staghorn sculpin *Leptocottus armatus*. *J. Fish Biol.* **68**, 1177-1191 (2006).
- 542 26. P. Domenici, R. W. Blake, The kinematics and performance of the escape response in the angelfish  
543 (*Pterophyllum eimekei*). *J. Exp. Biol.* **156**, 187-205 (1991).
- 544 27. N. Danos, G. V. Lauder, Challenging zebrafish escape responses by increasing water viscosity. *J.*  
545 *Exp. Biol.* **215**, 1854-1862 (2012).
- 546 28. M. Fleuren *et al.*, Three-dimensional analysis of the fast-start escape response of the least killifish,  
547 *Heterandria formosa*. *J. Exp. Biol.* **221** (2018).
- 548 29. D. J. Ellerby, J. D. Altringham, Spatial variation in fast muscle function of the rainbow trout  
549 *Oncorhynchus mykiss* during fast-starts and sprinting. *J. Exp. Biol.* **204**, 2239-2250 (2001).

- 550 30. P. Domenici, R. W. Blake, The kinematics and performance of fish fast-start swimming. *J. Exp.*  
551 *Biol.* **200**, 1165-1178 (1997).
- 552 31. D. Weihs, The mechanism of rapid starting of slender fish. *Biorheology* **10**, 343-350 (1973).
- 553 32. P. Domenici, D. Booth, J. M. Blagburn, J. P. Bacon, Escaping away from and towards a threat: The  
554 cockroach's strategy for staying alive. *Communicative and Integrative Biology* **2**, 497-500 (2009).
- 555 33. A. Nair, K. Changsing, W. J. Stewart, M. J. McHenry, Fish prey change strategy with the direction  
556 of a threat. *Proc. R. Soc. Lond. B* **284** (2017).
- 557 34. P. Domenici, D. Booth, J. M. Blagburn, J. P. Bacon, Cockroaches keep predators guessing by using  
558 preferred escape trajectories. *Curr. Biol.* **18**, 1792-1796 (2008).
- 559 35. R. H. J. M. Kurvers *et al.*, The evolution of lateralization in group hunting sailfish. *Curr. Biol.* **27**,  
560 521-526 (2017).
- 561 36. P. Domenici, R. S. Batty, Escape behaviour of solitary herring (*Clupea harengus*) and comparisons  
562 with schooling individuals. *Mar. Biol.* **128**, 29-38 (1997).
- 563 37. R. C. Eaton, R. K. K. Lee, M. B. Foreman, The Mauthner cell and other identified neurons of the  
564 brainstem escape network of fish. *Prog. Neurobiol.* **63**, 467-485 (2001).
- 565 38. O. Yono, T. Shimozawa, Synchronous firing by specific pairs of cercal giant interneurons in crickets  
566 encodes wind direction. *Biosystems* **93**, 218-225 (2008).
- 567 39. G. M. Card, Escape behaviors in insects. *Curr. Opin. Neurobiol.* **22**, 180-186 (2012).
- 568 40. R. Levi, J. M. Camhi, Population vector coding by the giant interneurons of the cockroach. *J.*  
569 *Neurosci.* **20**, 3822-3829 (2000).
- 570 41. W. J. Stewart, A. Nair, H. Jiang, M. J. McHenry, Prey fish escape by sensing the bow wave of a  
571 predator. *J. Exp. Biol.* **217**, 4328-4336 (2014).
- 572 42. K. Bhattacharyya, D. L. McLean, M. A. MacIver, Visual threat assessment and reticulospinal  
573 encoding of calibrated responses in larval zebrafish. *Curr. Biol.* **27**, 2751-2762 e2756 (2017).
- 574 43. A. Soto, W. J. Stewart, M. J. McHenry, When optimal strategy matters to prey fish. *Integr. Comp.*  
575 *Biol.* **55**, 110-120 (2015).
- 576 44. O. Akanyeti *et al.*, Accelerating fishes increase propulsive efficiency by modulating vortex ring  
577 geometry. *Proc. Natl. Acad. Sci. USA* **114**, 13828-13833 (2017).
- 578 45. T. Y. Moore, A. A. Biewener, Outrun or outmaneuver: predator-prey interactions as a model system  
579 for integrating biomechanical studies in a broader ecological and evolutionary context. *Integr.*  
580 *Comp. Biol.* **55**, 1188-1197 (2015).
- 581 46. D. M. Rand, G. V. Lauder, Prey capture in the chain pickerel, *Esox niger*: correlations between  
582 feeding and locomotor behavior. *Can. J. Zool.* **59**, 1072-1078 (1981).
- 583 47. R. Olberg, A. Worthington, K. Venator, Prey pursuit and interception in dragonflies. *J. Comp.*  
584 *Physiol. A Sens. Neural Behav. Physiol.* **186**, 155-162 (2000).
- 585 48. M. J. McHenry *et al.*, The pursuit strategy of predatory bluefish (*Pomatomus saltatrix*). *Proc. R.*  
586 *Soc. Lond. B* **286** (2019).
- 587 49. I. Aihara, E. Fujioka, S. Hiryu, Qualitative and quantitative analyses of the echolocation strategies

- 588 of bats on the basis of mathematical modelling and laboratory experiments. *PLoS ONE* **8** (2013).
- 589 50. A. J. Corcoran, W. E. Conner, How moths escape bats: predicting outcomes of predator-prey  
590 interactions. *J. Exp. Biol.* **219**, 2704-2715 (2016).
- 591 51. H. C. Howland, Optimal strategies for predator avoidance: The relative importance of speed and  
592 manoeuvrability. *J. Theor. Biol.* **47**, 333-350 (1974).
- 593 52. W. J. Stewart, G. S. Cardenas, M. J. McHenry, Zebrafish larvae evade predators by sensing water  
594 flow. *J. Exp. Biol.* **216**, 388-398 (2013).
- 595 53. A. Zuur, E. N. Ieno, N. Walker, A. A. Saveliev, G. M. Smith, *Mixed effects models and extensions in*  
596 *ecology with R* (Springer, New York, 2009), pp. 574.
- 597 54. S. L. Brilleman, L. D. Howe, R. Wolfe, K. Tilling, Bayesian piecewise linear mixed models with a  
598 random change point: an application to BMI rebound in childhood. *Epidemiology* **28**, 827-833  
599 (2017).
- 600 55. M. Kéry, M. Schaub, *Bayesian population analysis using winbugs – a hierarchical perspective*  
601 (Academic Press, Burlington, 2011), pp. 535.
- 602 56. J. H. Zar, *Biostatistical analysis: fifth edition* (Pearson Education, New Jersey, 2010), pp. 944.

603

604

605 Table 1. Widely applicable or Watanabe–Akaike information criterion (WAIC) for each model in the  
606 hierarchical Bayesian models

| Relationship                                                 | WAIC   | $\Delta$ WAIC |
|--------------------------------------------------------------|--------|---------------|
| $ \alpha $ - $T_1$ relationship                              |        |               |
| <b>Piecewise linear</b>                                      | 1363.7 | 0             |
| Linear                                                       | 1376.7 | 7.0           |
| Constant                                                     | 1581.1 | 217.4         |
| $ \alpha $ -initial velocity after stage 1 turn relationship |        |               |
| <b>Piecewise linear</b>                                      | -218.1 | 0             |
| Linear                                                       | -205.1 | 13.0          |
| Constant                                                     | -171.5 | 46.6          |

607  $|\alpha|$ , absolute value of the turn angle;  $T_1$ , time required for a displacement of 15 mm from the initial  
608 position. The best models are shown in bold.

609

610



611 Table 2. Comparison of the distribution of escape trajectories (ETs) between the model prediction and  
612 experimental data using the two-sample Kuiper test

| Model                                                | Median Kuiper's $V$ | Median $P$ | Rate of $P > 0.05$ |
|------------------------------------------------------|---------------------|------------|--------------------|
| With both $D_{\text{attack}}$ and $T_1( \alpha )$    | 0.10                | 0.63       | 0.99               |
| With $D_{\text{attack}}$ and without $T_1( \alpha )$ | 0.25                | $< 0.01$   | 0.00               |
| Without $D_{\text{attack}}$ and with $T_1( \alpha )$ | 0.18                | $< 0.01$   | 0.13               |
| Neither $D_{\text{attack}}$ nor $T_1( \alpha )$      | 0.28                | $< 0.01$   | 0.00               |

613  $D_{\text{attack}}$ , distance between the prey's initial position and the endpoint of the predator attack;  $T_1(|\alpha|)$ ,  
614 relationship between the absolute value of the turn angle and the time required for a 15-mm  
615 displacement from the initial position (i.e., the time required for the prey to turn).

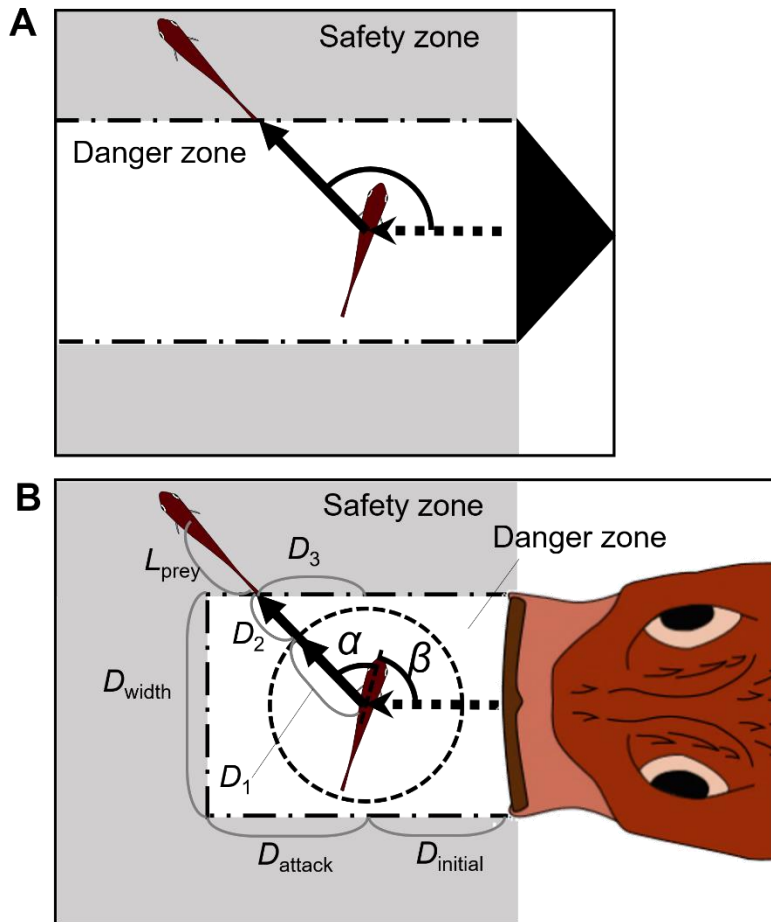

616

617

618

619

620

621

622

623

624

625

Fig. 1. A proposed geometrical model for animal escape trajectories. (A) A previous geometrical model proposed by Domenici (15). The predation threat with a certain width (the tail of a killer whale, represented by the black triangle) directly approaches the prey, and the prey should reach the safety zone (grey area) outside the danger zone (white area) before the threat reaches that point. In this model, the prey can instantaneously escape in any direction, and the predation threat moves linearly and infinitely. (B) Two factors are added to Domenici's model: the endpoint of the predator attack, and the time required for the prey to turn. See the text for details of the definitions of the variables and mathematical formulas.

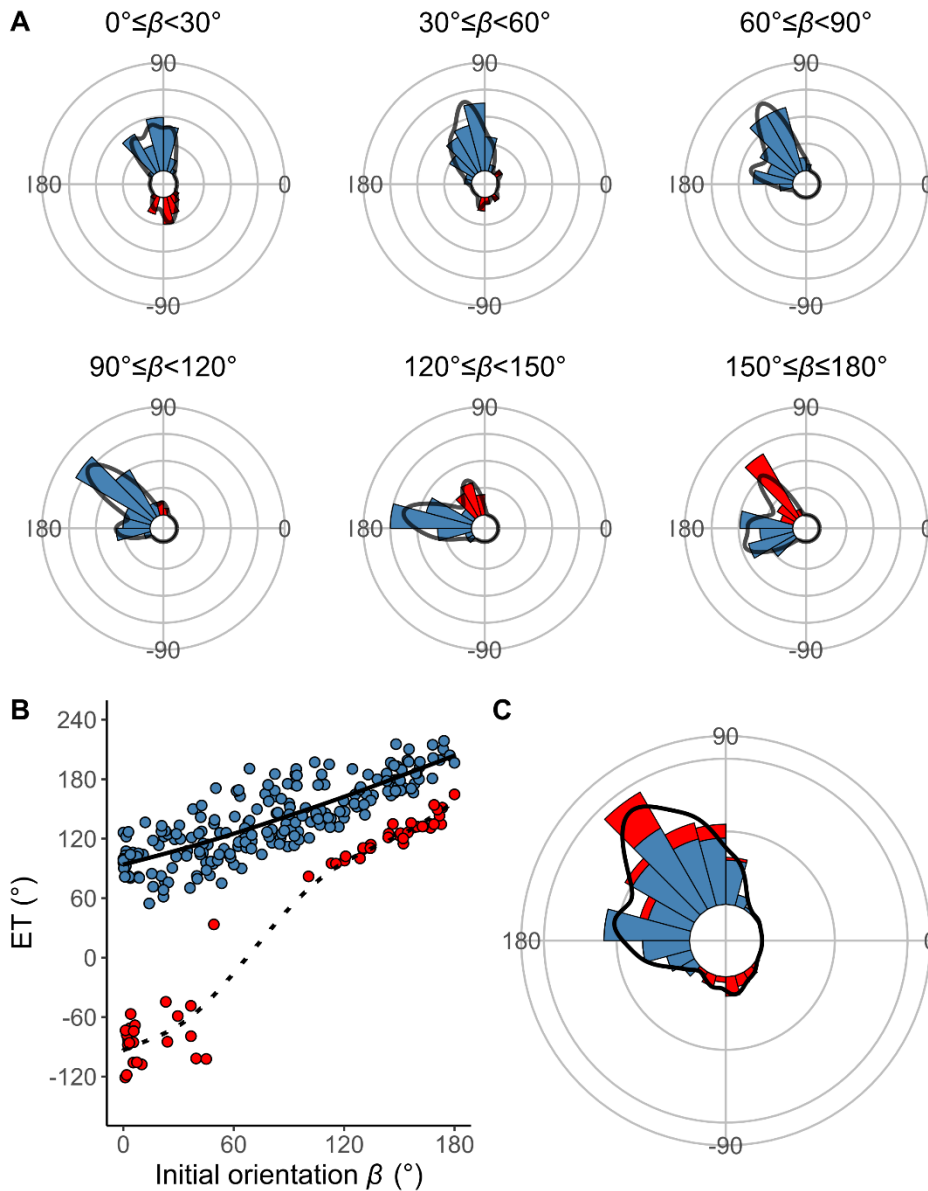

626

627

628

629

630

631

632

633

634

635

636

Fig. 2. Results of the experiments of *Pagrus major* attacked by a dummy predator (i.e., a cast of *Sebastes marmoratus*). (A) Circular histograms of escape trajectories (ETs) in  $30^\circ$  initial orientation  $\beta$  bins. Solid lines are estimated by the kernel probability density function. Concentric circles represent 5% of the total sample sizes, the bin intervals are  $15^\circ$ , and the bandwidths of the kernel are 50. (B) Relationship between initial orientation and ET. Different colors represent the away (blue) and toward (red) responses. Solid and dotted lines are estimated by the generalized additive mixed model (GAMM). (C) Circular histogram of ETs pooling all the data shown in A. Solid lines are estimated by the kernel probability density function. Concentric circles represent 5% of the total sample sizes, the bin intervals are  $15^\circ$ , and the bandwidths of the kernel are 50. The predator is approaching from the  $0^\circ$  direction.

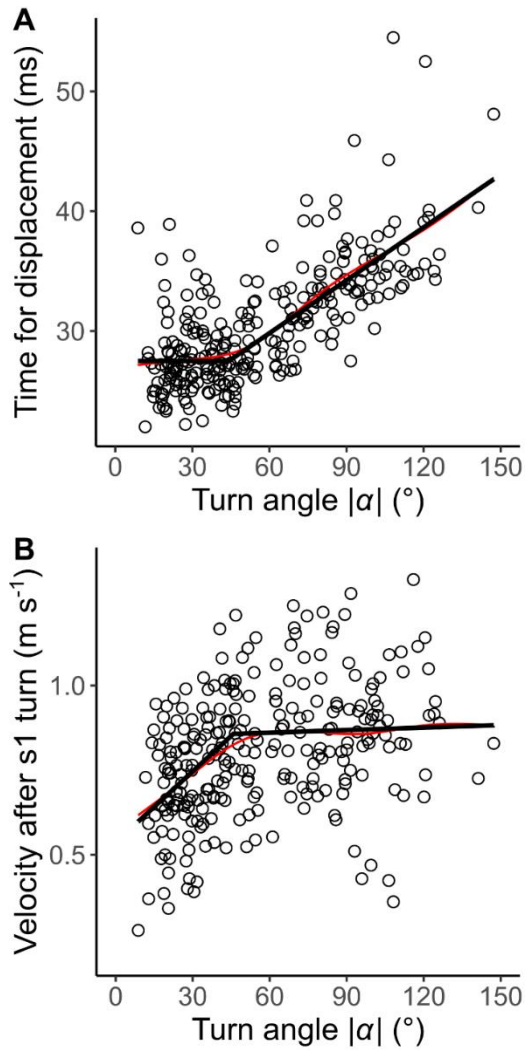

637

638

639

640

641

642

643

Fig. 3. The relationship between the absolute value of the turn angle  $|\alpha|$  and time-distance variables. (A) Relationship between  $|\alpha|$  and the time required for a displacement of 15 mm from the initial position of the prey. (B) Relationship between  $|\alpha|$  and the initial velocity after stage 1 turn. Solid black lines are estimated by the piecewise linear regression model, and red lines are estimated by the generalized additive mixed model (GAMM).

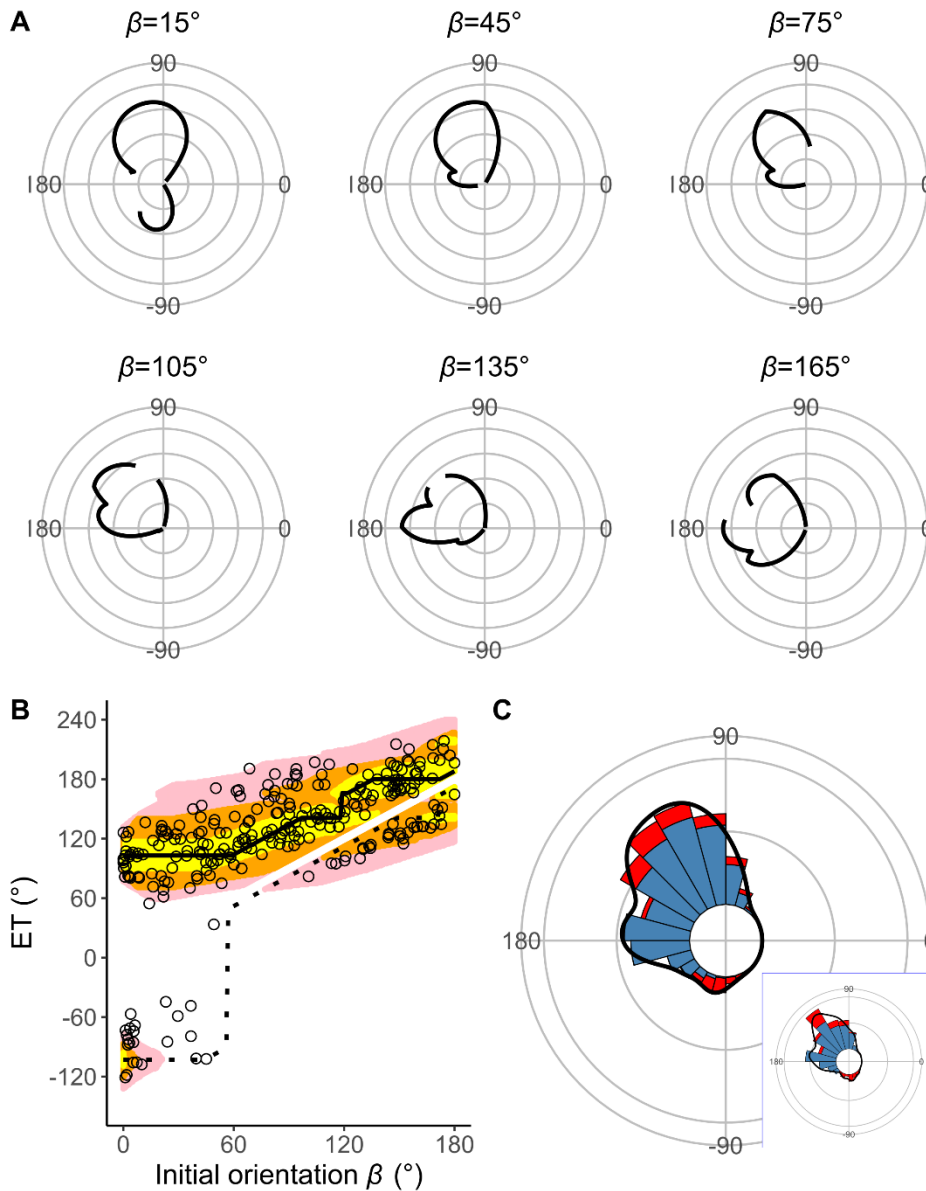

644

645 Fig. 4. Model estimates. (A) Circular plots of the time difference between the prey and predator  $T_{\text{diff}}$  in  
 646 different initial orientations  $\beta$ . The time difference of the best escape trajectory (ET) was regarded as 10 ms,  
 647 and the relative time differences between 0 and 10 ms are shown by solid lines. Areas without solid lines  
 648 indicate that either the time difference is below 0 or the fish cannot reach that ET because of the constraint on  
 649 the possible range of turn angles  $|\alpha|$ . Concentric circles represent 3 ms. (B) Relationship between the initial  
 650 orientation  $\beta$  and ET. Solid and dotted lines represent the best-estimated away and toward responses,  
 651 respectively. Different colors represent the top 10%, 25%, and 40% quantiles of the time difference between  
 652 the prey and predator within all possible ETs. (C) Circular histogram of the theoretical ETs, estimated by a  
 653 Monte Carlo simulation. The probability of selection of an ET was determined by the truncated normal  
 654 distribution of the optimal ranking index (Fig. S5). This process was repeated 1000 times to estimate the  
 655 frequency distribution of the theoretical ETs. Colors in the bars represent the away (blue) or toward (red)  
 656 responses. Black lines represent the kernel probability density function. Concentric circles represent 10 % of  
 657 the total sample sizes, the bin intervals are  $15^\circ$ , and the bandwidths of the kernel are 50. Circular histogram  
 658 of the observed ETs (Fig. 2C) is shown in the lower right panel for comparison. The predator is approaching  
 659 from the  $0^\circ$  direction.

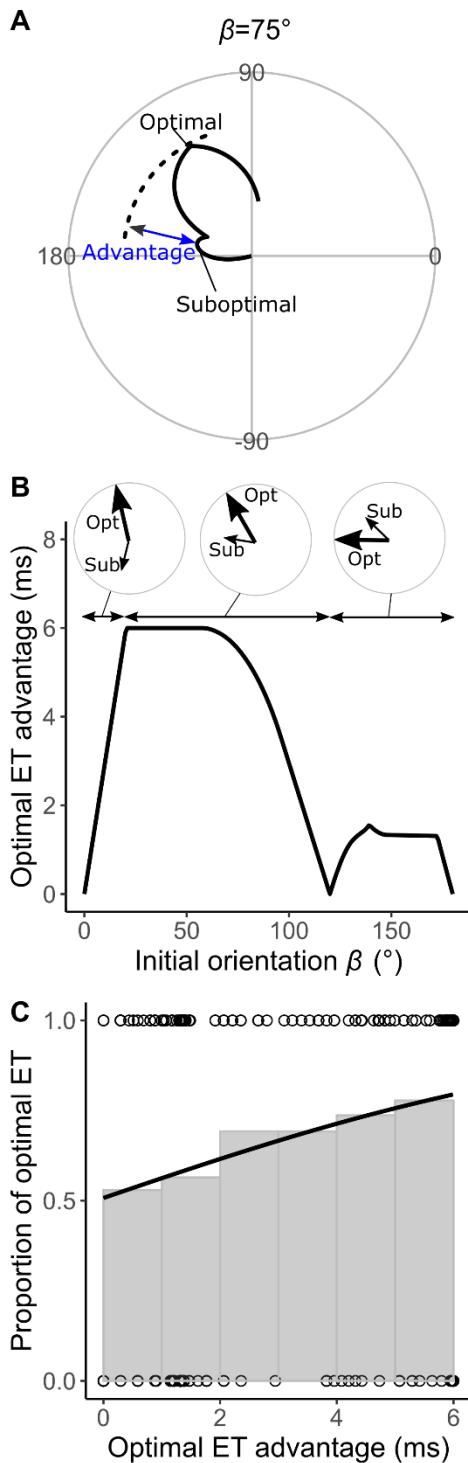

660

661

662

663

664

665

666

667

668

Fig. 5. Analyses of the probability that the prey chooses the optimal vs. suboptimal ETs. (A) The time difference between the prey and predator  $T_{diff}$  at the initial orientation  $\beta$  of  $75^\circ$  is shown as an example. We defined the difference between the maximum of  $T_{diff}$  (at the optimal ET) and the second local maximum of  $T_{diff}$  (at the suboptimal ET) as the optimal ET advantage. (B) Relationship between the initial orientation  $\beta$  and the optimal ET advantage. Large and small arrows in circles represent the optimal and suboptimal ETs, respectively. (C) Relationship between the optimal ET advantage and the proportion of the optimal ET used by the real prey. Optimal ET and suboptimal ET are designated as 1 and 0, respectively. The line was estimated by the mixed effects logistic regression analysis.

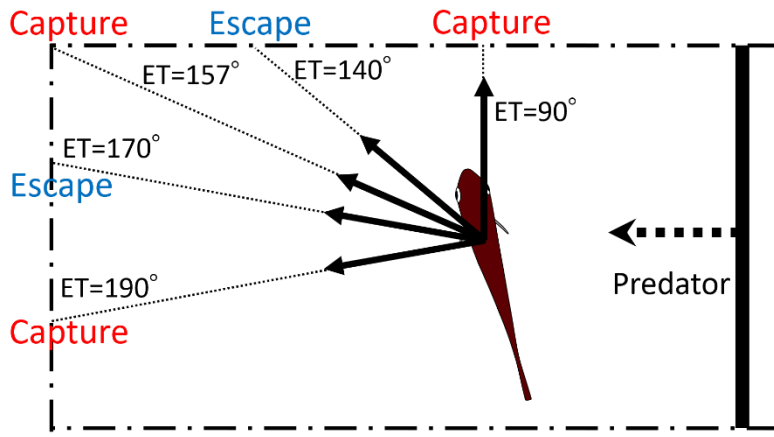

669  
670 Fig. 6. Schematic drawing showing how multiple escape trajectories (ETs) result in successful escapes from  
671 predators. The dash-dotted rectangle represents the danger zone the prey needs to exit in order to escape  
672 predation, outside of which is the safety zone. When the prey escapes toward the corner of the rectangular  
673 danger zone (ET=157°) to exit it, it needs to travel a relatively long distance and therefore the predator can  
674 catch it. On the other hand, when the prey escapes with an ET at 170° or 140°, it covers a shorter distance and  
675 can reach the safety zone before the predator's arrival. When the prey escapes with an even smaller ET (90°),  
676 it will be captured because the shorter travel distance for the predator overrides the benefits of the smaller turn  
677 and shorter travel distance for the prey. When the prey escapes with an even larger ET (190°), it will also be  
678 captured, because the prey requires a longer time to turn than if escaping along the 170° ET, whereas the travel  
679 distance for both predator and prey is the same as that for the 170° ET. In this example, the initial orientation,  
680 flight initiation distance, and the body length posterior to the center of mass were set as 110°, 60 mm and 30  
681 mm, respectively.

682

683 Table S1. Akaike information criterion (AIC) for 1–9 Gaussian mixture models to estimate the empirical ET  
684 distribution

| Number of peaks | AIC    | $\Delta$ AIC |
|-----------------|--------|--------------|
| <b>3</b>        | 2777.1 | 0.0          |
| 4               | 2781.0 | 3.9          |
| 2               | 2784.1 | 6.9          |
| 5               | 2787.1 | 10.0         |
| 6               | 2791.1 | 14.0         |
| 7               | 2797.1 | 20.0         |
| 8               | 2798.9 | 21.8         |
| 9               | 2799.2 | 22.1         |
| 1               | 2855.7 | 78.6         |

685 The best model is shown in bold.



686 Table S2. Widely applicable or Watanabe–Akaike information criterion (WAIC) for each model to estimate  
687 the relationship between the absolute value of the turn angle and the time required for a displacement of 10 or  
688 20 mm from the initial position

| Length of displacement  | WAIC   | $\Delta$ WAIC |
|-------------------------|--------|---------------|
| 10 mm                   |        |               |
| <b>Piecewise linear</b> | 1239.7 | 0             |
| Linear                  | 1259.0 | 19.3          |
| Constant                | 1524.4 | 284.7         |
| 20 mm                   |        |               |
| <b>Piecewise linear</b> | 1543.3 | 0             |
| Linear                  | 1547.0 | 3.7           |
| Constant                | 1689.7 | 146.4         |

689 The best models are shown in bold.

690 Table S3. Comparison of the distribution of escape trajectories (ETs) between the model prediction and  
691 experimental data using the two-sample Kuiper test

| Distance for the fast-start phase                    | Median Kuiper's $V$ | Median $P$ | Rate of $P > 0.05$ |
|------------------------------------------------------|---------------------|------------|--------------------|
| 10 mm                                                |                     |            |                    |
| With both $D_{\text{attack}}$ and $T_1( \alpha )$    | 0.10                | 0.63       | 0.99               |
| With $D_{\text{attack}}$ and without $T_1( \alpha )$ | 0.25                | < 0.01     | 0.00               |
| Without $D_{\text{attack}}$ and with $T_1( \alpha )$ | 0.17                | < 0.05     | 0.25               |
| Neither $D_{\text{attack}}$ nor $T_1( \alpha )$      | 0.28                | < 0.01     | 0.00               |
| 20 mm                                                |                     |            |                    |
| With both $D_{\text{attack}}$ and $T_1( \alpha )$    | 0.11                | 0.44       | 0.96               |
| With $D_{\text{attack}}$ and without $T_1( \alpha )$ | 0.25                | < 0.01     | 0.00               |
| Without $D_{\text{attack}}$ and with $T_1( \alpha )$ | 0.15                | < 0.05     | 0.46               |
| Neither $D_{\text{attack}}$ nor $T_1( \alpha )$      | 0.28                | < 0.01     | 0.00               |

692 The distance for the fast-start phase was regarded as either 10 or 20 mm.  $D_{\text{attack}}$ , distance between the prey's  
693 initial position and the endpoint of the predator attack;  $T_1(|\alpha|)$ , relationship between the absolute value of the  
694 turn angle and the time required for a 15-mm displacement from the initial position (i.e., the time required for  
695 the prey to turn).

696

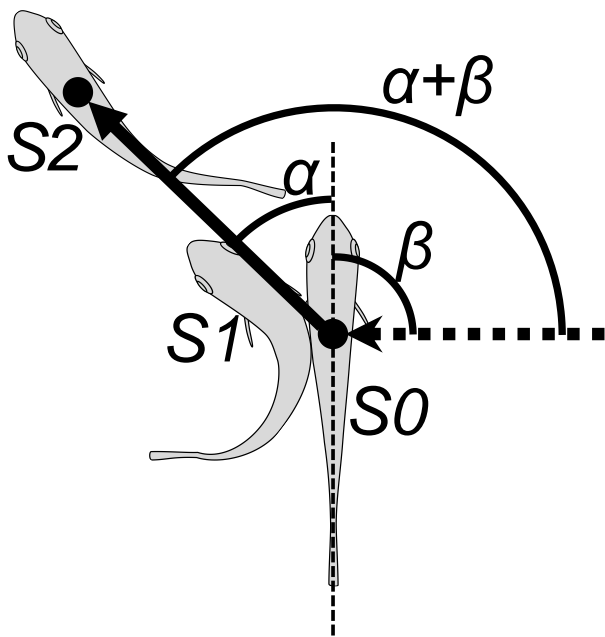

697

698 Fig. S1. Schematic drawing of angular variables. *Filled circle* position of the center of mass; *Dotted arrow*  
699 approach direction of the dummy predator;  $S_0$  position of the fish at the onset of stage 1,  $S_1$  position at the  
700 end of stage 1,  $S_2$  position at the end of stage 2,  $\alpha$  turn angle,  $\beta$  initial orientation,  $\alpha + \beta$  escape trajectory (ET).  
701

702

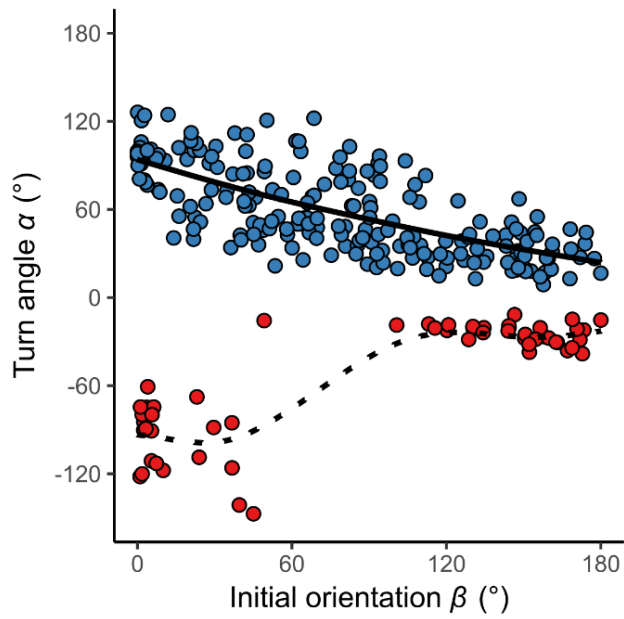

703

704 Fig. S2. Relationship between initial orientation  $\beta$  and turn angle  $\alpha$  in the experiment. Different colors  
705 represent the away (blue) and toward (red) responses. Solid and dotted lines are estimated by the generalized  
706 additive mixed model (GAMM).

707

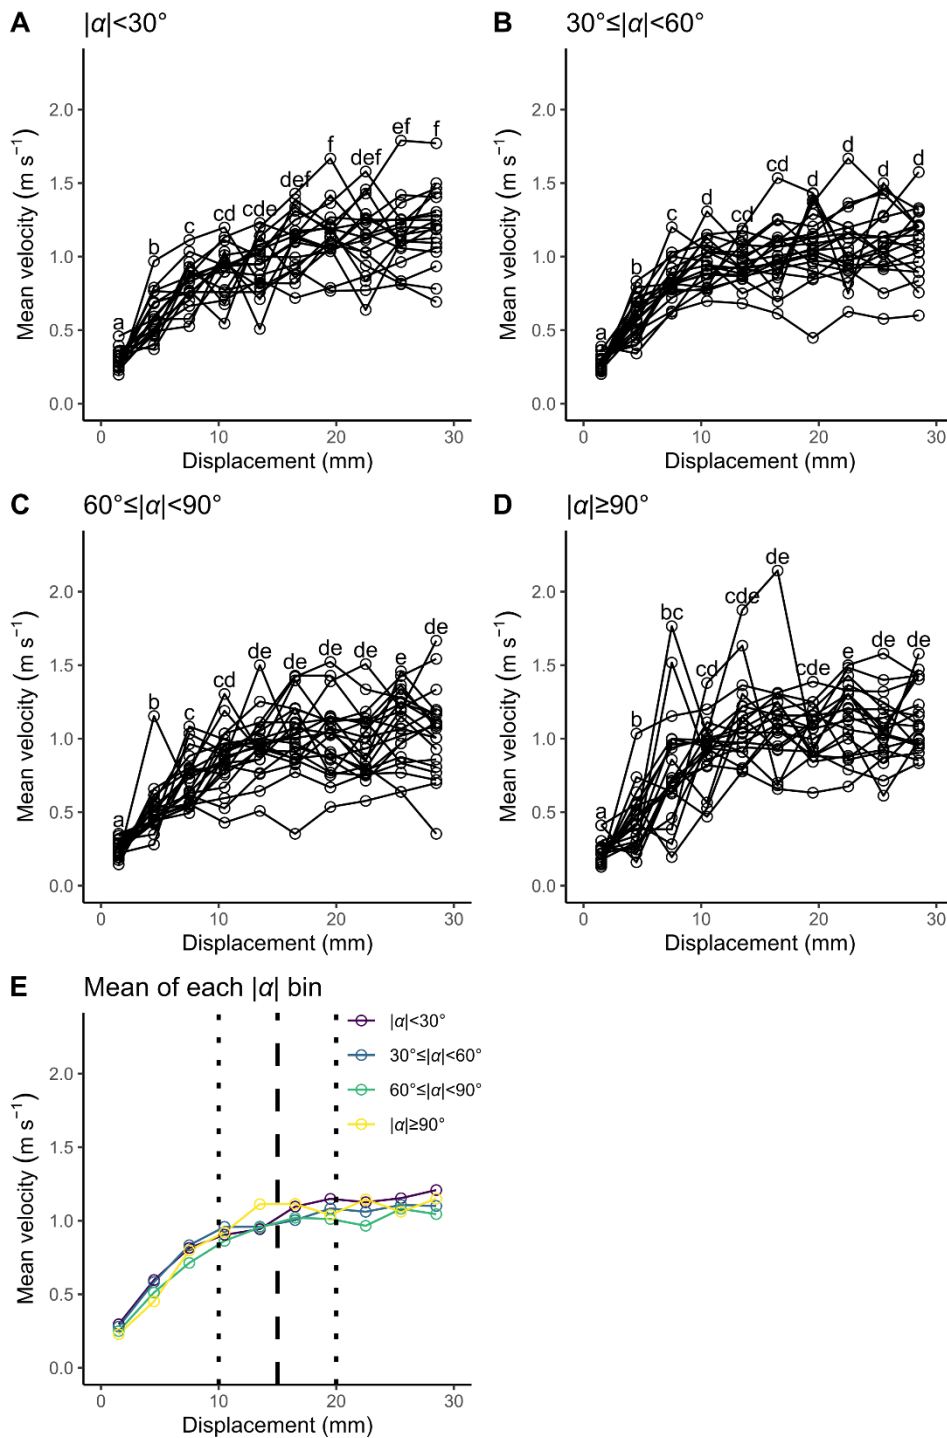

708

709

710

711

712

713

714

715

716

Fig. S3. Relationship between displacement from the initial position (3-mm intervals: 0–3, 3–6, ..., and 27–30 mm) and mean velocity during the displacement for each turn angle ( $|\alpha|$ ) bin. Unfilled circles denote the mean value for each individual. Different lowercase letters represent significant differences according to the paired  $t$ -test with Bonferroni's correction ( $P < 0.05$ ). (A)  $|\alpha| < 30^\circ$ . (B)  $30^\circ \leq |\alpha| < 60^\circ$ . (C)  $60^\circ \leq |\alpha| < 90^\circ$ . (D)  $|\alpha| \geq 90^\circ$ . (E) Mean of the individual mean value for each  $|\alpha|$  bin. Vertical dashed line represents the cut-off distance of 15 mm used in this study, and vertical dotted lines represent the other cut-off distances tested in this study (Tables S2 and S3).

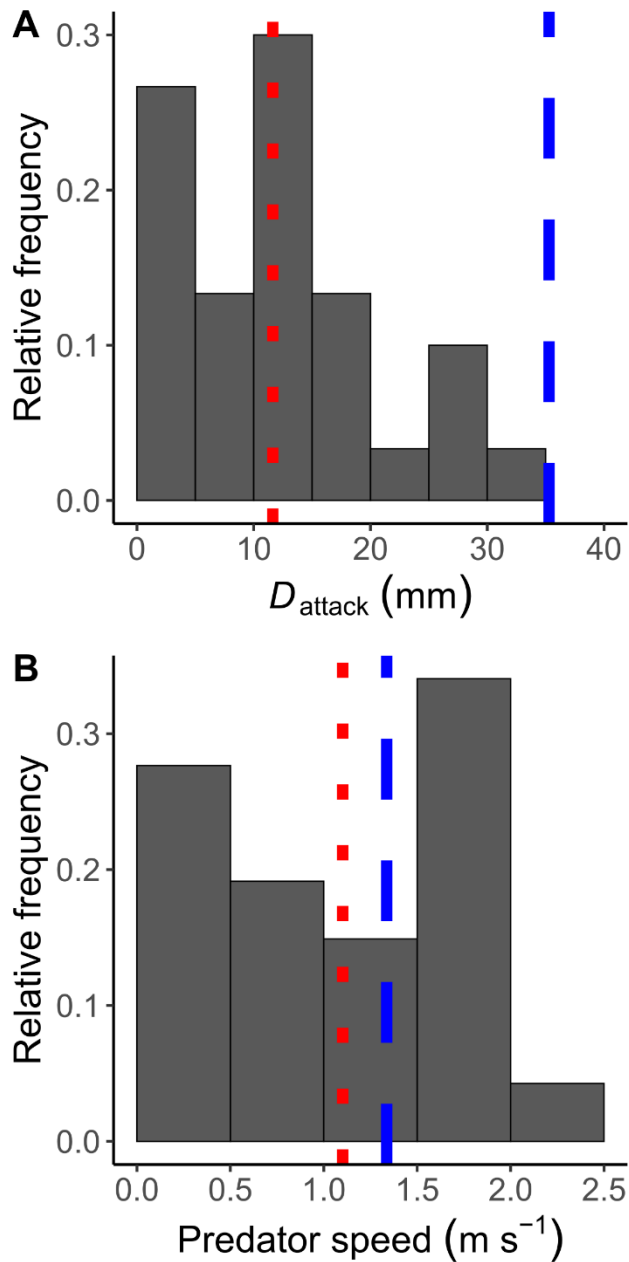

717  
718 Fig. S4. Predator attack parameters. (A) Histogram of the distance between the prey's initial position and the  
719 predator's mouth position at the onset of the mouth closing ( $D_{\text{attack}}$ ). (B) Histogram of the speed of the real  
720 predator *Sebastiscus marmoratus*. Both figures are based on reanalysis of data from Kimura and Kawabata  
721 (12). Vertical dashed blue lines represent the optimal values independently estimated in this study, and vertical  
722 dotted red lines represent the mean values of the real predator.

723

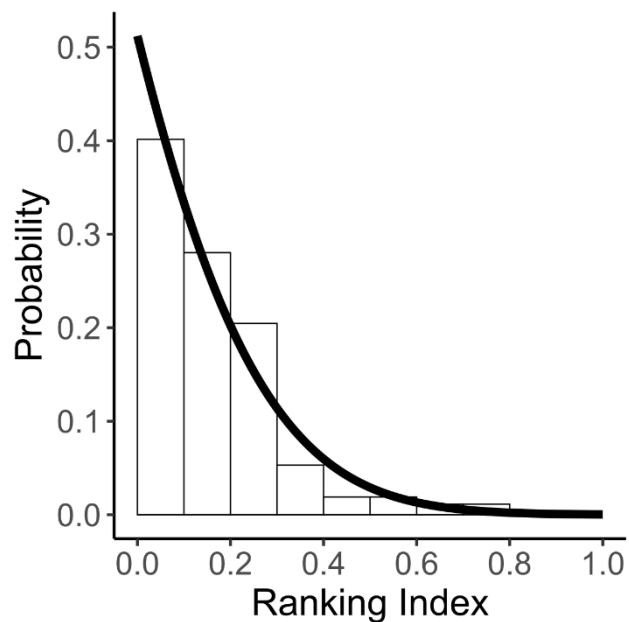

724

725

726

727

728

Fig. S5. Histogram of the ranking index, where 0 indicates that the real fish chose the theoretically optimal escape trajectory (ET) and 1 indicates that the real fish chose the theoretically worst ET. The solid line is the density probability function of the truncated normal distribution.

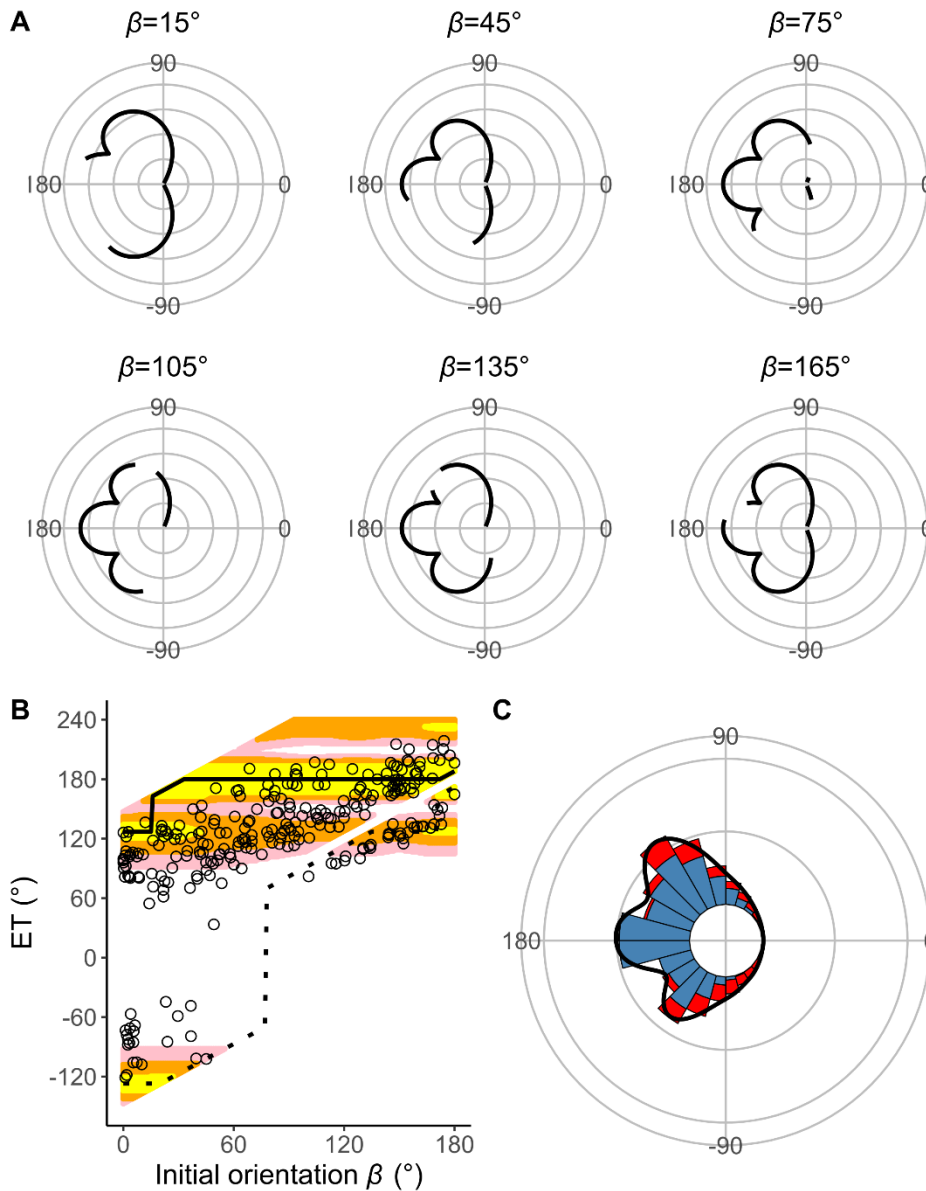

729

730 Fig. S6. Estimates of the model with  $D_{\text{attack}}$  (the distance between the prey's initial position and the endpoint  
731 of the predator attack) and without  $T_1(|\alpha|)$  (the relationship between the absolute value of the turn angle  $|\alpha|$  and  
732 the time required for a 15-mm displacement from the initial position, or the time required for prey to turn).  
733 (A) Circular plots of the time difference between the prey and predator  $T_{\text{diff}}$  in different initial orientations  $\beta$ .  
734 The time difference of the best escape trajectory (ET) was regarded as 10 ms, and the relative time differences  
735 between 0 and 10 ms are shown by solid lines. Areas without solid lines indicate that either the time difference  
736 is below 0 or the fish cannot go to that ET because of the constraint on the possible range of  $|\alpha|$ . Concentric  
737 circles represent 3 ms. (B) Relationship between the initial orientation  $\beta$  and ET. Solid and dotted lines  
738 represent the best-estimated away and toward responses, respectively. Different colors represent the top 10%,  
739 25%, and 40% quantiles of the time difference between the prey and predator within all possible ETs. (C)  
740 Circular histogram of the theoretical ETs, estimated by a Monte Carlo simulation. The probability of selection  
741 of an ET was determined by the truncated normal distribution of the optimal ranking index. This process was  
742 repeated 1000 times to estimate the frequency distribution of the theoretical ETs. Colors in the bars represent  
743 the away (blue) or toward (red) responses. Black lines represent the kernel probability density function.  
744 Concentric circles represent 10 % of the total sample sizes, the bin intervals are  $15^\circ$ , and the bandwidths of  
745 the kernel are 50. The predator is approaching from the  $0^\circ$  direction.



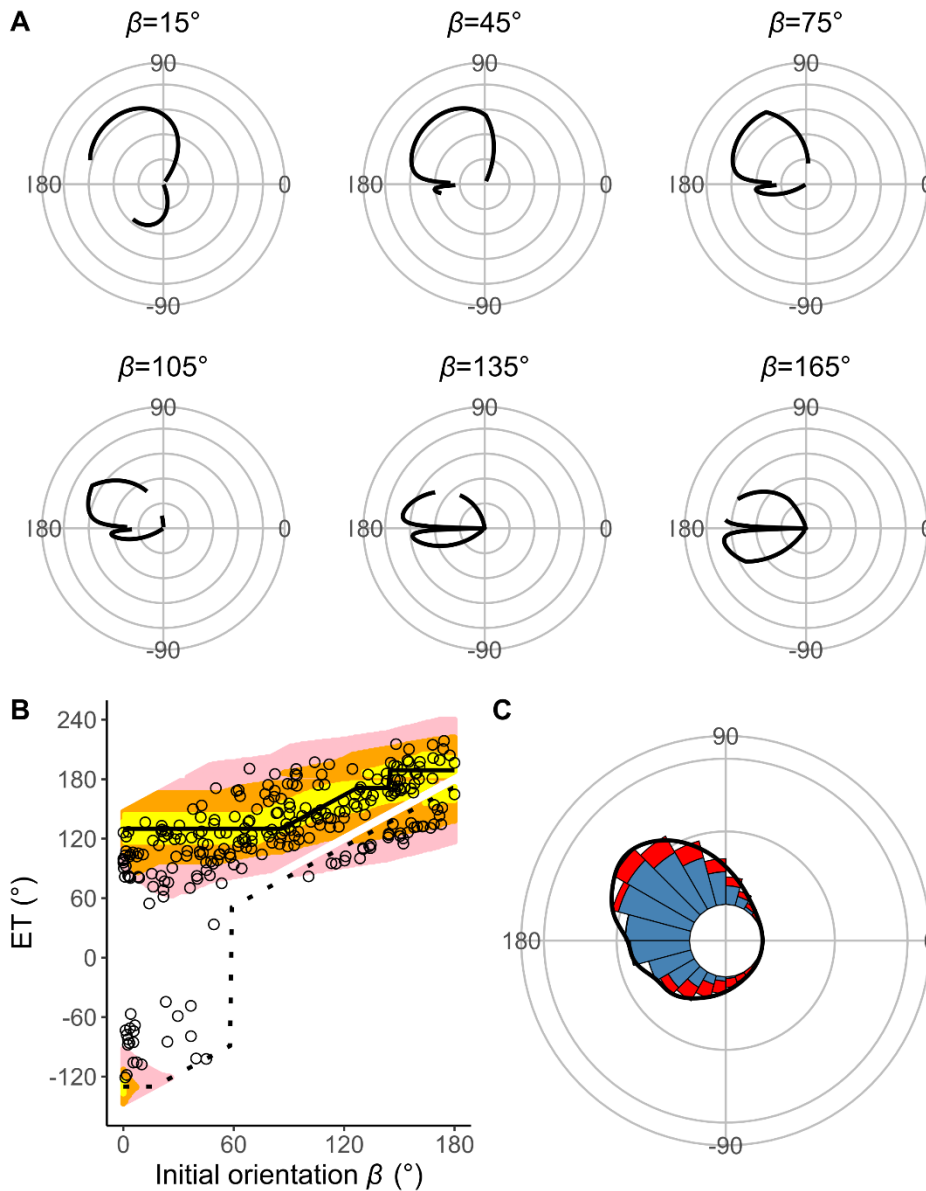

746

747 Fig. S7. Estimates of the model with  $T_1(|\alpha|)$  (the relationship between the absolute value of the turn angle  $|\alpha|$   
748 and the time required for a 15-mm displacement from the initial position, or the time required for the prey to  
749 turn) and without  $D_{\text{attack}}$  (the distance between the prey's initial position and the endpoint of the predator  
750 attack). (A) Circular plots of the time difference between the prey and predator  $T_{\text{diff}}$  in different initial  
751 orientations  $\beta$ . The time difference of the best escape trajectory (ET) was regarded as 10 ms, and the relative  
752 time differences between 0 and 10 ms are shown by solid lines. Areas without solid lines indicate that either  
753 the time difference is below 0 or the fish cannot go to that ET because of the constraint on the possible range  
754 of  $|\alpha|$ . Concentric circles represent 3 ms. (B) Relationship between the initial orientation  $\beta$  and ET. Solid and  
755 dotted lines represent the best-estimated away and toward responses, respectively. Different colors represent  
756 the top 10%, 25%, and 40% quantiles of the time difference between the prey and predator within all possible  
757 ETs. (C) Circular histogram of the theoretical ETs, estimated by a Monte Carlo simulation. The probability of  
758 selection of an ET was determined by the truncated normal distribution of the optimal ranking index. This  
759 process was repeated 1000 times to estimate the frequency distribution of the theoretical ETs. Colors in the  
760 bars represent the away (blue) or toward (red) responses. Black lines represent the kernel probability density  
761 function. Concentric circles represent 10 % of the total sample sizes, the bin intervals are  $15^\circ$ , and the  
762 bandwidths of the kernel are 50. The predator is approaching from the  $0^\circ$  direction.

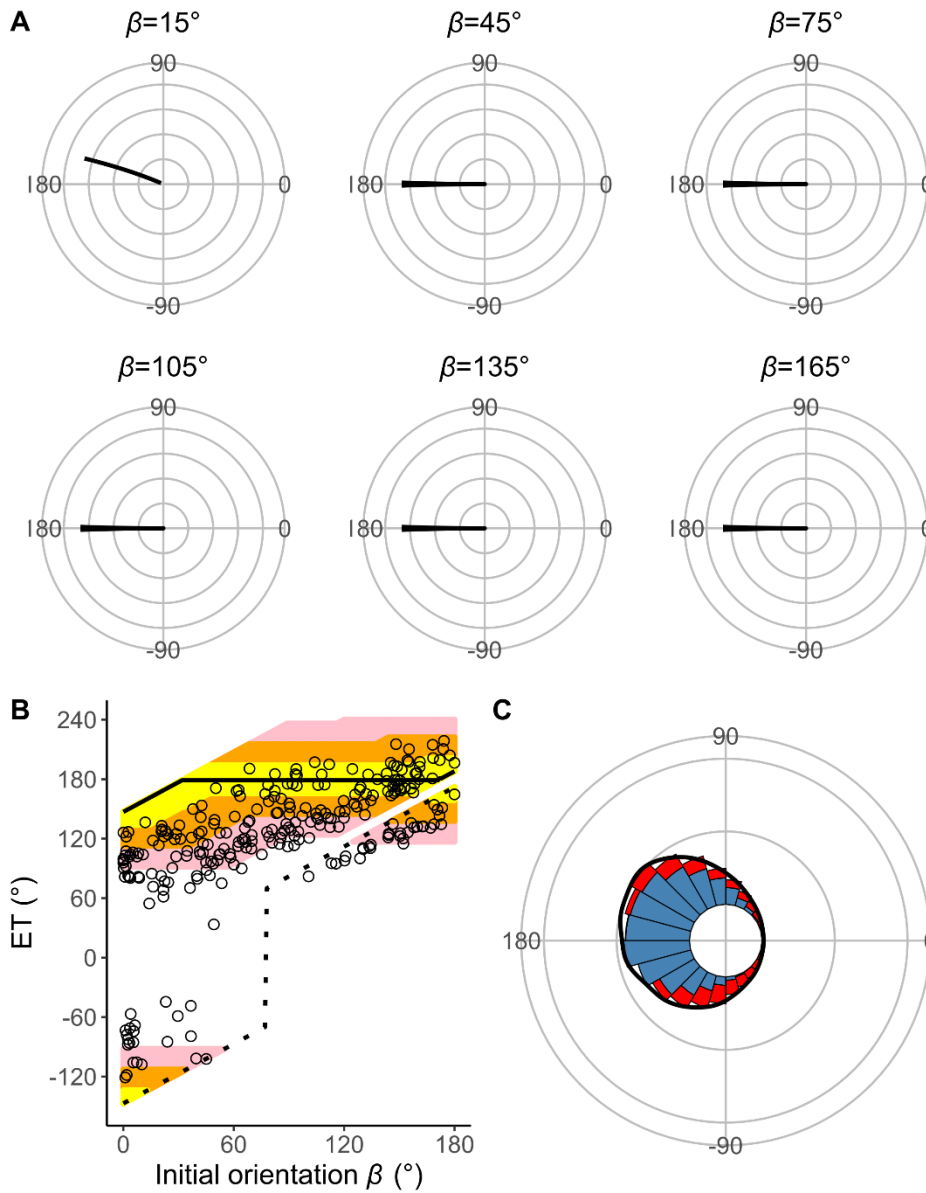

763

764 Fig. S8. Estimates of the model that includes neither  $D_{\text{attack}}$  (the distance between the prey's initial position  
765 and the endpoint of the predator attack) nor  $T_1(|\alpha|)$  (the relationship between the absolute value of the turn  
766 angle  $|\alpha|$  and the time required for a 15-mm displacement from the initial position, or the time required for the  
767 prey to turn). (A) Circular plots of the time difference between the prey and predator  $T_{\text{diff}}$  in different initial  
768 orientations  $\beta$ . The time difference of the best escape trajectory (ET) was regarded as 10 ms, and the relative  
769 time differences between 0 and 10 ms are shown by solid lines. Areas without solid lines indicate that either  
770 the time difference is below 0 or the fish cannot go to that ET because of the constraint on the possible range  
771 of  $|\alpha|$ . Concentric circles represent 3 ms. (B) Relationship between the initial orientation  $\beta$  and ET. Solid and  
772 dotted lines represent the best-estimated away and toward responses, respectively. Different colors represent  
773 the top 10%, 25%, and 40% quantiles of the time difference between the prey and predator within all possible  
774 ETs. (C) Circular histogram of the theoretical ETs, estimated by a Monte Carlo simulation. The probability of  
775 selection of an ET was determined by the truncated normal distribution of the optimal ranking index. This  
776 process was repeated 1000 times to estimate the frequency distribution of the theoretical ETs. Colors in the  
777 bars represent the away (blue) or toward (red) responses. Black lines represent the kernel probability density  
778 function. Concentric circles represent 10 % of the total sample sizes, the bin intervals are  $15^\circ$ , and the  
779 bandwidths of the kernel are 50. The predator is approaching from the  $0^\circ$  direction.

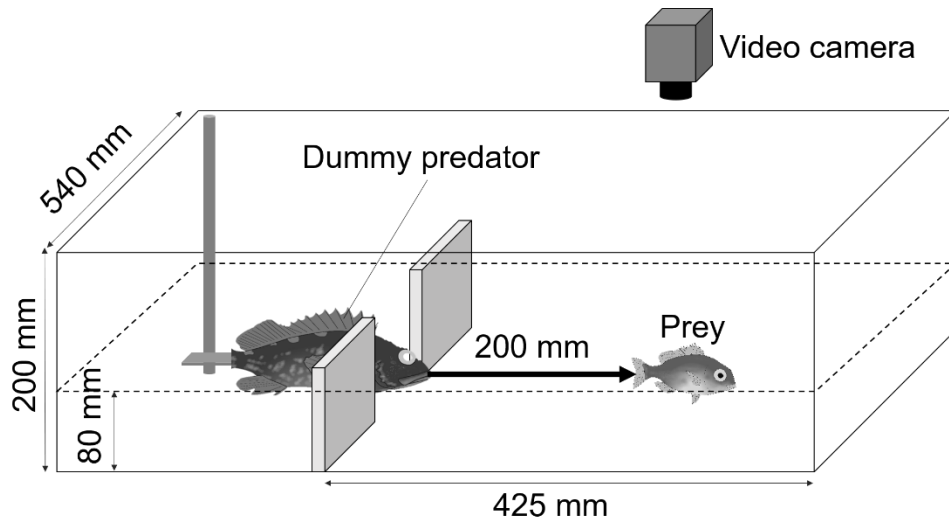

780

781 Fig. S9. Sketch of the experimental apparatus for measuring the escape response of prey fish *Pagrus major*.
